# Supplementary material for: Monthly-Resolved Cave Proxy Evidence for Northward Gulf Stream Migration During the Little Ice Age
Source: Research Square preprint supplement (doi:10.21203/rs.3.rs-5973851/v1), 2025-03-26
Supplement: Supplementary file 1 [file 5ce078e508880008fe01179f.xlsx]

## Sheet: Table S1
Table S1. Uranium-series chronological data
Decay constants (52): 9.1705 × 10-6 yr-1 for 230Th, 2.8221 × 10-6 yr-1 for 234U.
Italics indicate replicate analysis on sub-samples.
2se unceratinties are arbitrarily selected to be 50%
Sample Name	Lab Code	Depth	238U	Uncertainty	232Th	Uncertainty	[230Th/232Th]	Uncertainty	(230Th/232Th)	Uncertainty	(232Th/238U)	Uncertainty	(234U/238U)	Uncertainty	(230Th/238U)	Uncertainty	Age: 238U/232Th = 0.8 ± 0.4	Uncertainty	Age: 238U/232Th = 5 ± 2.5	Uncertainty
		mm	ng/g	± 2se	ng/g	± 2se	atomic ratio (x10-6)	± 2se	activity ratio	± 2se	activity ratio	± 2se	activity ratio	± 2se	activity ratio	± 2se	ka	± 2se	ka	± 2se
BER-SWI-UTh-1	STAiG-UTh-dcn-562	8	94.5451	0.300379	0.190651	0.00421961	28.8447	0.641879	5.33907	0.11881	0.000659805	1.45999e-05	1.06044	0.00185363	0.00352274	0.00021	0.3083	0.0217	0.0227	0.2724
BER-SWI-UTh-2	BIG-UTh-N-435	15	84.6227	0.202776	0.0325234	0.000708401	81.8365	3.50609	15.1477	0.648967	0.000125754	2.79955e-06	1.05779	0.00161628	0.00190489	0.000215101	0.1857	0.0227	0.1311	0.0567
BER-SWI-UTh-3	STAiG-UTh-dcn-561	26	97.8934	0.320683	0.0255796	0.000615828	135.915	4.03017	25.1574	0.745972	8.54979e-05	2.0733e-06	1.05657	0.00181016	0.00215091	0.00018	0.2151	0.0186	0.1783	0.0397
BER-SWI-UTh-4	BIG-UTh-N-437	35	98.1983	0.269821	0.0552457	0.00114126	78.974	3.15242	14.6178	0.583503	0.000184081	3.89486e-06	1.05192	0.00184827	0.00269087	0.000356049	0.264	0.0374	0.1838	0.085
BER-SWI-UTh-5	STAiG-UTh-dcn-560	47	118.5	0.380221	0.0545792	0.00132356	196.65	3.99206	36.3994	0.738919	0.000150704	3.53195e-06	1.05417	0.00182619	0.00548554	0.00024	0.5568	0.025	0.4912	0.0673
BER-SWI-UTh-6	BIG-UTh-N-439	57.5	135.499	0.327468	0.0341455	0.000687321	215.423	3.94014	39.8741	0.729309	8.24539e-05	1.64261e-06	1.05381	0.00165372	0.00328777	0.00023433	0.3342	0.0239	0.2985	0.0415
BER-SWI-UTh-7	STAiG-UTh-dcn-558	67.5	85.8579	0.282941	0.0282913	0.000812791	179.893	4.78715	33.2976	0.886088	0.000107817	2.90658e-06	1.05481	0.00191083	0.00359005	0.00024	0.3628	0.0249	0.3159	0.0511
BER-SWI-UTh-8	BIG-UTh-N-441	80	110.552	0.309791	0.0218737	0.000494577	333.437	10.3572	61.7183	1.91709	6.47397e-05	1.34463e-06	1.06058	0.00207095	0.00399562	0.000308859	0.4067	0.032	0.3786	0.0417
BER-SWI-UTh-9	STAiG-UTh-dcn-557	96	85.7073	0.256521	0.013825	0.000573106	454.548	10.3586	84.1355	1.91735	5.27791e-05	2.15851e-06	1.06074	0.00179985	0.0044406	0.00027	0.453	0.0279	0.4301	0.0354
BER-SWI-UTh-10	BIG-UTh-N-451	106	96.8008	1.94513	0.0171188	0.000532667	403.756	10.6249	74.7341	1.96664	5.78641e-05	1.33374e-06	1.06082	0.00182168	0.00432442	0.000324865	0.4402	0.033	0.4152	0.0407
BER-SWI-UTh-11	STAiG-UTh-dcn-556	128	86.2367	0.287957	0.0148376	0.000408642	461.856	11.4593	85.4883	2.12109	5.62971e-05	1.72154e-06	1.0579	0.0022676	0.00481274	0.0003	0.4923	0.0311	0.468	0.0387
BER-SWI-UTh-12	BIG-UTh-N-453	156	95.2834	1.72786	0.0452301	0.00130623	176.244	4.66214	32.6223	0.862947	0.000155319	3.52559e-06	1.06188	0.00164497	0.00506686	0.000321093	0.5091	0.033	0.4422	0.0717
BER-SWI-UTh-13(1)	STAiG-UTh-dcn-541		95.4803	2.1681	0.0114553	0.000725837	690.943	29.8713	127.892	5.52909	3.92562e-05	1.89239e-06	1.05138	0.00213967	0.00502053	0.00054	0.5186	0.0552	0.5016	0.0586
BER-SWI-UTh-13(2)	STAiG-UTh-dcn-542		98.9681	2.68119	0.0351876	0.00167487	234.15	10.3993	43.3405	1.92489	0.000116335	3.76389e-06	1.05004	0.0022509	0.00504201	0.0006	0.515	0.0621	0.4644	0.0851
BER-SWI-UTh-13(3)	STAiG-UTh-dcn-543		95.1602	2.02903	0.0126701	0.000607494	641.881	24.4216	118.81	4.52037	4.35651e-05	1.70839e-06	1.05357	0.00239848	0.00517597	0.00054	0.5338	0.0552	0.5146	0.0594
BER-SWI-UTh-13(mean)		165									4.98e-05	2.6e-06	1.0516	0.0026	0.00508	0.00063	0.5239	0.0646	0.5021	0.0692
BER-SWI-UTh-14	BIG-UTh-N-455	174	298.617	1.84147	0.0635229	0.00136859	408.354	8.43796	75.5852	1.56184	6.96034e-05	1.47365e-06	1.05735	0.00175091	0.00526098	0.000136677	0.538	0.0551	0.5077	0.0381
BER-SWI-UTh-15(1)	STAiG-UTh-dcn-538		83.7007	0.237508	0.012157	0.000416988	593.1	21.4814	109.781	3.97615	4.7524e-05	1.62086e-06	1.04753	0.00196336	0.00521723	0.00051	0.5407	0.0524	0.5198	0.0577
BER-SWI-UTh-15(2)	STAiG-UTh-dcn-539		84.1317	0.33094	0.00740673	0.000507216	996.533	48.9086	184.455	9.05284	2.88059e-05	1.97728e-06	1.04571	0.0022265	0.00531341	0.00081	0.5527	0.0832	0.54	0.0845
BER-SWI-UTh-15(3)	STAiG-UTh-dcn-540		84.0901	0.305842	0.0135964	0.000549658	556.482	25.1533	103.003	4.6558	5.29046e-05	1.99285e-06	1.0432	0.00205269	0.00544933	0.00072	0.5667	0.0743	0.5435	0.0789
BER-SWI-UTh-15 (mean)		179									4.33e-05	2.3e-06	1.0455	0.0024	0.0053	0.00073	0.5506	0.0752	0.5317	0.0781
BER-SWI-UTh-16	BIG-UTh-N-457	190	362.359	2.13567	0.355141	0.00731614	130.523	2.48044	24.1594	0.459122	0.000320684	6.3634e-06	1.05664	0.00171791	0.00774754	0.000146037	0.7762	0.0156	0.637	0.1335
