# Supplementary material for: Monthly-Resolved Cave Proxy Evidence for Northward Gulf Stream Migration During the Little Ice Age
Source: Research Square preprint supplement (doi:10.21203/rs.3.rs-5973851/v1), 2025-03-26
Supplement: Supplementary file 2 [file bd8bef5c873502a0035fa3a9.xlsx]

## Sheet: Table S2
Table S2. Radiocarbon chronological data
DCF correction applied in the 'average' radiocarbon chronology model
Sample ID	Depth	F14C	Error	14C Age	Error
	mm	pMC	abs.	year BP
SWI-14C-01	0	1.04911	0.00316584	-385.103	24.2405
SWI-14C-02	3	1.00477	0.00306832	-38.2398	24.5306
SWI-14C-03	7.5	0.959776	0.00296182	329.794	24.7892
SWI-14C-04	12.5	0.952064	0.00282464	394.6	23.8325
SWI-14C-05	17.5	0.957909	0.00295724	345.436	24.7991
SWI-14C-06	22.5	0.958414	0.00286487	341.202	24.0118
SWI-14C-07	27.5	0.956935	0.00294941	353.611	24.7587
SWI-14C-08	32.5	0.94658	0.00281816	441.002	23.9157
SWI-14C-09	37.5	0.946567	0.0029	441.114	24.6105
SWI-14C-10	42.5	0.944834	0.00282261	455.839	23.9977
SWI-14C-11	47.5	0.94661	0.00291142	440.753	24.7063
SWI-14C-13	57.5	0.940125	0.00299225	495.969	25.5673
SWI-14C-15	67.5	0.929962	0.00290952	583.281	25.1322
SWI-14C-17	77.5	0.924972	0.00288071	626.504	25.0175
SWI-14C-19	87.5	0.917077	0.0028581	695.365	25.0349
SWI-14C-21	97.5	0.919293	0.00285707	675.971	24.9655
SWI-14C-23	107.5	0.914713	0.00286758	716.098	25.1829
SWI-14C-25	117.5	0.91859	0.00289004	682.118	25.2729
SWI-14C-27	127.5	0.918264	0.00279599	684.97	24.4592
SWI-14C-29	137.5	0.919367	0.00276855	675.331	24.1901
SWI-14C-31	147.5	0.913311	0.00273833	728.412	24.0847
SWI-14C-33	157.5	0.911297	0.00280425	746.148	24.719
SWI-14C-35	167.5	0.905997	0.00271773	793.009	24.0965
SWI-14C-37	177.5	0.910337	0.00278135	754.617	24.543
SWI-14C-39	192.5	0.902414	0.00282813	824.837	25.1749
