# Supplementary material for: Monthly-Resolved Cave Proxy Evidence for Northward Gulf Stream Migration During the Little Ice Age
Source: Research Square preprint supplement (doi:10.21203/rs.3.rs-5973851/v1), 2025-03-26
Supplement: Supplementary file 4 [file f836b0547fcd3cc25874047a.xlsx]

## Sheet: Table S3
Table S3. The monthly and annual stalagmite-derived SST record
Upper and lower bounds represent the 95% confidence interval of the regression
Year	SST	Lower	Upper		Year	SST	Lower	Upper
CE	°C	°C	°C		CE	°C	°C	°C
2012.97	24.0011	23.8088	24.1933		2012	24.0011	23.8088	24.1933
2012.89	24.0011	23.8088	24.1933		2011	24.0444	23.8472	24.2416
2012.81	24.0011	23.8088	24.1933		2010	24.0264	23.8313	24.2215
2012.72	23.9819	23.7918	24.172		2009	23.9575	23.7702	24.1449
2012.64	23.9699	23.7812	24.1587		2008	24.0729	23.8725	24.2734
2012.56	23.9805	23.7906	24.1704		2007	24.0079	23.8149	24.2009
2012.47	23.9969	23.8051	24.1887		2006	24.0525	23.8544	24.2506
2012.39	24.0199	23.8255	24.2143		2005	23.9934	23.802	24.1848
2012.31	24.0283	23.833	24.2237		2004	23.7966	23.6272	23.966
2012.22	24.0302	23.8346	24.2258		2003	23.7982	23.6286	23.9678
2012.14	24.0371	23.8408	24.2335		2002	23.8748	23.6967	24.0529
2012.06	24.0418	23.8449	24.2387		2001	23.8168	23.6451	23.9884
2011.97	24.0447	23.8474	24.2419		2000	23.7418	23.5784	23.9053
2011.89	24.0506	23.8527	24.2485		1999	23.7595	23.5942	23.9249
2011.81	24.0624	23.8631	24.2616		1998	23.7963	23.6269	23.9656
2011.72	24.0442	23.847	24.2414		1997	23.7634	23.5976	23.9292
2011.64	24.04	23.8433	24.2367		1996	23.7678	23.6015	23.934
2011.56	24.0581	23.8594	24.2569		1995	23.7117	23.5516	23.8719
2011.47	24.0459	23.8485	24.2432		1994	23.8047	23.6344	23.975
2011.39	24.0421	23.8452	24.239		1993	23.5788	23.4328	23.7249
2011.31	24.0453	23.848	24.2426		1992	23.559	23.415	23.703
2011.22	24.013	23.8194	24.2067		1991	23.6016	23.4531	23.75
2011.14	23.9868	23.7962	24.1775		1990	23.515	23.3755	23.6545
2011.06	23.9934	23.802	24.1848		1989	23.3101	23.1904	23.4297
2010.97	23.9813	23.7913	24.1713		1988	23.7496	23.5854	23.9139
2010.89	23.973	23.7839	24.1621		1987	23.6706	23.5148	23.8263
2010.81	24.024	23.8291	24.2189		1986	23.6382	23.4858	23.7905
2010.72	24.0288	23.8334	24.2242		1985	23.6037	23.455	23.7524
2010.64	24.0087	23.8156	24.2018		1984	23.5165	23.3768	23.6562
2010.56	24.0018	23.8094	24.1941		1983	22.8905	22.8017	22.9794
2010.47	24.0447	23.8475	24.2419		1982	23.2924	23.1744	23.4105
2010.39	24.046	23.8486	24.2434		1981	23.0135	22.9176	23.1095
2010.31	24.0369	23.8406	24.2333		1980	23.3215	23.2008	23.4422
2010.22	24.0379	23.8414	24.2343		1979	23.464	23.3296	23.5984
2010.14	24.049	23.8512	24.2467		1978	22.771	22.6869	22.8552
2010.06	23.9611	23.7733	24.1488		1977	23.5559	23.4122	23.6996
2009.97	23.9203	23.7371	24.1034		1976	23.6514	23.4977	23.8051
2009.89	23.9271	23.7432	24.111		1975	23.6334	23.4816	23.7852
2009.81	23.9467	23.7606	24.1328		1974	23.4537	23.3203	23.5871
2009.72	23.9493	23.7629	24.1357		1973	23.5368	23.3951	23.6786
2009.64	24.0095	23.8163	24.2027		1972	23.4497	23.3167	23.5826
2009.56	24.0174	23.8233	24.2115		1971	23.6273	23.4761	23.7785
2009.47	24.0113	23.8179	24.2047		1970	23.3349	23.213	23.4569
2009.39	23.9671	23.7787	24.1555		1969	23.1967	23.087	23.3064
2009.31	23.9354	23.7506	24.1202		1968	23.3766	23.2507	23.5025
2009.22	23.9431	23.7574	24.1288		1967	23.3308	23.2092	23.4523
2009.14	23.9657	23.7775	24.154		1966	22.8834	22.7949	22.972
2009.06	23.9892	23.7983	24.1801		1965	23.1778	23.0696	23.2859
2008.97	24.0503	23.8524	24.2482		1964	23.5515	23.4082	23.6947
2008.89	24.0686	23.8686	24.2685		1963	22.7727	22.6885	22.8569
2008.81	24.0626	23.8633	24.2619		1962	22.5893	22.5075	22.6712
2008.72	24.0527	23.8546	24.2509		1961	22.9557	22.8633	23.0481
2008.64	24.0482	23.8506	24.2458		1960	23.4147	23.2852	23.5443
2008.56	24.0479	23.8503	24.2455		1959	23.1562	23.0498	23.2626
2008.47	24.0772	23.8763	24.2782		1958	23.2271	23.1148	23.3394
2008.39	24.121	23.915	24.327		1957	23.4866	23.35	23.6233
2008.31	24.1608	23.9503	24.3714		1956	22.9818	22.8879	23.0757
2008.22	24.1849	23.9716	24.3983		1955	23.4499	23.3169	23.5829
2008.14	24.2011	23.9858	24.4163		1954	22.8764	22.7882	22.9646
2008.06	24.2182	24.001	24.4354		1953	23.0119	22.916	23.1077
2007.97	24.2142	23.9975	24.431		1952	23.0705	22.9706	23.1704
2007.89	24.179	23.9663	24.3916		1951	23.1085	23.0059	23.2112
2007.81	24.123	23.9168	24.3292		1950	23.8632	23.6864	24.0399
2007.72	24.078	23.877	24.279		1949	23.9774	23.7878	24.167
2007.64	24.0349	23.8388	24.231		1948	23.579	23.4329	23.7251
2007.56	23.9641	23.7761	24.1522		1947	23.253	23.1385	23.3676
2007.47	23.8813	23.7025	24.0601		1946	22.2746	22.1824	22.3669
2007.39	23.8782	23.6997	24.0566		1945	22.291	22.1997	22.3824
2007.31	23.8941	23.7139	24.0743		1944	22.6807	22.5985	22.763
2007.22	23.9211	23.7379	24.1043		1943	22.4976	22.4145	22.5808
2007.14	23.9809	23.7909	24.1709		1942	22.9687	22.8756	23.0618
2007.06	24.0833	23.8817	24.285		1941	23.6313	23.4797	23.7829
2006.97	24.1069	23.9026	24.3113		1940	23.3177	23.1974	23.4381
2006.89	24.1149	23.9097	24.3202		1939	23.1871	23.0782	23.296
2006.81	24.0891	23.8868	24.2914		1938	23.2917	23.1737	23.4097
2006.72	24.0607	23.8617	24.2598		1937	23.7127	23.5524	23.873
2006.64	24.0387	23.8422	24.2353		1936	23.6688	23.5133	23.8244
2006.56	24.0453	23.848	24.2427		1935	23.5756	23.4299	23.7214
2006.47	24.0393	23.8427	24.236		1934	23.2522	23.1377	23.3666
2006.39	24.0513	23.8533	24.2493		1933	23.0884	22.9872	23.1895
2006.31	24.0595	23.8606	24.2585		1932	22.9327	22.8416	23.0238
2006.22	24.0537	23.8554	24.2519		1931	22.6588	22.5768	22.7408
2006.14	24.051	23.853	24.2489		1930	22.4015	22.3154	22.4876
2006.06	24.0469	23.8494	24.2444		1929	22.724	22.6411	22.807
2005.97	24.0552	23.8568	24.2536		1928	23.2058	23.0953	23.3162
2005.89	24.0491	23.8514	24.2469		1927	22.731	22.6479	22.8142
2005.81	24.0595	23.8606	24.2584		1926	22.5707	22.4887	22.6527
2005.72	24.0617	23.8625	24.2609		1925	22.7957	22.7107	22.8806
2005.64	24.0507	23.8528	24.2486		1924	22.8739	22.7858	22.9619
2005.56	24.0131	23.8195	24.2067		1923	22.5953	22.5134	22.6771
2005.47	23.9737	23.7845	24.1629		1922	22.7037	22.6211	22.7862
2005.39	23.9102	23.7282	24.0922		1921	22.585	22.5031	22.6669
2005.31	23.8562	23.6803	24.0322		1920	23.2037	23.0934	23.314
2005.22	23.8159	23.6443	23.9874		1919	22.8949	22.8058	22.9839
2005.14	23.7775	23.6102	23.9448		1918	22.7352	22.6519	22.8184
2005.06	23.7632	23.5974	23.9289		1917	22.6552	22.5732	22.7372
2004.97	23.794	23.6249	23.9631		1916	22.7161	22.6333	22.799
2004.89	23.7912	23.6224	23.96		1915	22.7405	22.6572	22.8239
2004.81	23.8124	23.6412	23.9835		1914	22.7443	22.6608	22.8277
2004.72	23.8261	23.6535	23.9988		1913	22.2446	22.1506	22.3387
2004.64	23.8276	23.6548	24.0004		1912	22.4102	22.3244	22.4959
2004.56	23.8049	23.6346	23.9753		1911	22.8897	22.8009	22.9785
2004.47	23.8127	23.6415	23.9838		1910	22.8236	22.7377	22.9096
2004.39	23.7992	23.6295	23.9689		1909	22.9252	22.8345	23.0158
2004.31	23.7938	23.6247	23.9629		1908	22.9018	22.8123	22.9912
2004.22	23.7656	23.5996	23.9316		1907	22.7547	22.671	22.8384
2004.14	23.7117	23.5516	23.8719		1906	23.4107	23.2816	23.5399
2004.06	23.6915	23.5335	23.8495		1905	23.1426	23.0373	23.2479
2003.97	23.6882	23.5305	23.8458		1904	22.5827	22.5008	22.6646
2003.89	23.7063	23.5468	23.8659		1903	22.8087	22.7233	22.8941
2003.81	23.7272	23.5654	23.889		1902	23.3351	23.2131	23.457
2003.72	23.7793	23.6118	23.9468		1901	23.1928	23.0834	23.3021
2003.64	23.8171	23.6454	23.9888		1900	23.2883	23.1707	23.406
2003.56	23.8463	23.6714	24.0212		1899	23.7113	23.5512	23.8714
2003.47	23.86	23.6836	24.0364		1898	23.5591	23.415	23.7031
2003.39	23.8895	23.7098	24.0692		1897	23.248	23.1339	23.3621
2003.31	23.8946	23.7143	24.0749		1896	23.641	23.4884	23.7936
2003.22	23.8445	23.6698	24.0192		1895	23.4411	23.3089	23.5732
2003.14	23.7467	23.5828	23.9107		1894	23.0451	22.947	23.1432
2003.06	23.7104	23.5504	23.8705		1893	23.2815	23.1644	23.3985
2002.97	23.7359	23.5731	23.8987		1892	23.3398	23.2174	23.4622
2002.89	23.7553	23.5904	23.9202		1891	23.103	23.0008	23.2053
2002.81	23.8188	23.647	23.9907		1890	23.2932	23.1751	23.4113
2002.72	23.9022	23.7211	24.0833		1889	23.3915	23.2642	23.5188
2002.64	23.9195	23.7364	24.1026		1888	23.5145	23.375	23.654
2002.56	23.8893	23.7096	24.069		1887	22.7849	22.7003	22.8695
2002.47	23.8985	23.7178	24.0792		1886	23.2868	23.1693	23.4043
2002.39	23.8903	23.7105	24.0701		1885	23.0187	22.9224	23.115
2002.31	23.8795	23.7009	24.0581		1884	22.8874	22.7987	22.9762
2002.22	23.8701	23.6925	24.0476		1883	23.0153	22.9192	23.1113
2002.14	23.8176	23.6459	23.9893		1882	22.6893	22.607	22.7717
2002.06	23.7647	23.5988	23.9306		1881	22.8586	22.7712	22.946
2001.97	23.6467	23.4935	23.7999		1880	22.1951	22.0978	22.2924
2001.89	23.5827	23.4362	23.7292		1879	23.065	22.9655	23.1645
2001.81	23.5992	23.451	23.7474		1878	22.6846	22.6023	22.7669
2001.72	23.6662	23.5109	23.8215		1877	22.6234	22.5415	22.7052
2001.64	23.7157	23.5551	23.8763		1876	22.749	22.6654	22.8325
2001.56	23.833	23.6596	24.0064		1875	22.2601	22.167	22.3532
2001.47	23.9053	23.7238	24.0868		1874	21.9294	21.8108	22.048
2001.39	23.9022	23.7211	24.0833		1873	22.0319	21.9222	22.1416
2001.31	23.8822	23.7033	24.061		1872	21.5657	21.4108	21.7206
2001.22	23.8574	23.6813	24.0336		1871	21.6043	21.4534	21.7551
2001.14	23.8282	23.6553	24.0011		1870	21.7317	21.594	21.8694
2001.06	23.8053	23.6349	23.9757		1869	22.2347	22.14	22.3294
2000.97	23.7842	23.6161	23.9522		1868	21.8467	21.7204	21.9731
2000.89	23.7478	23.5838	23.9119		1867	21.6226	21.4738	21.7715
2000.81	23.7547	23.5899	23.9195		1866	21.634	21.4863	21.7817
2000.72	23.7526	23.588	23.9172		1865	21.3399	21.1603	21.5195
2000.64	23.739	23.5759	23.9022		1864	21.3263	21.1452	21.5074
2000.56	23.7245	23.5629	23.886		1863	21.8743	21.7505	21.998
2000.47	23.7299	23.5678	23.8921		1862	21.6913	21.5495	21.833
2000.39	23.7074	23.5477	23.867		1861	21.9475	21.8305	22.0645
2000.31	23.7127	23.5525	23.873		1860	22.2599	22.1668	22.353
2000.22	23.7367	23.5738	23.8996		1859	21.7947	21.6633	21.9261
2000.14	23.7509	23.5865	23.9153		1858	22.2393	22.145	22.3337
2000.06	23.7447	23.5809	23.9084		1857	22.5743	22.4923	22.6563
1999.97	23.8011	23.6312	23.971		1856	22.6616	22.5796	22.7437
1999.89	23.7757	23.6086	23.9429		1855	22.1153	22.0122	22.2183
1999.81	23.7678	23.6015	23.934		1854	21.7156	21.5764	21.8549
1999.72	23.8069	23.6364	23.9775		1853	21.5906	21.4383	21.7428
1999.64	23.8189	23.6471	23.9908		1852	21.5965	21.4448	21.7481
1999.56	23.7367	23.5738	23.8995		1851	20.8707	20.6372	21.1043
1999.47	23.7459	23.582	23.9097		1850	21.2251	21.0326	21.4176
1999.39	23.7158	23.5552	23.8764		1849	21.3924	21.2186	21.5661
1999.31	23.6598	23.5052	23.8145		1848	21.3893	21.2152	21.5634
1999.22	23.6805	23.5237	23.8374		1847	21.1544	20.9539	21.355
1999.14	23.7512	23.5868	23.9157		1846	21.5828	21.4297	21.7359
1999.06	23.7836	23.6156	23.9515		1845	22.7034	22.6208	22.786
1998.97	23.8647	23.6878	24.0417		1844	22.4275	22.3424	22.5126
1998.89	23.9036	23.7224	24.0849		1843	21.4364	21.2675	21.6053
1998.81	23.8696	23.6921	24.0471		1842	21.7827	21.6501	21.9153
1998.72	23.8379	23.6639	24.0118		1841	21.7457	21.6094	21.882
1998.64	23.8226	23.6503	23.9948		1840	21.6536	21.5079	21.7992
1998.56	23.7634	23.5977	23.9292		1839	21.1919	20.9956	21.3882
1998.47	23.7306	23.5684	23.8928		1838	21.6584	21.5132	21.8035
1998.39	23.782	23.6142	23.9499		1837	22.2591	22.166	22.3523
1998.31	23.7768	23.6096	23.9441		1836	21.3415	21.1621	21.5209
1998.22	23.7633	23.5975	23.929		1835	21.3307	21.1501	21.5113
1998.14	23.7857	23.6175	23.9539		1834	21.3832	21.2084	21.5579
1998.06	23.8068	23.6362	23.9773		1833	22.8792	22.7909	22.9676
1997.97	23.7744	23.6074	23.9414		1832	21.5644	21.4093	21.7194
1997.89	23.761	23.5955	23.9265		1831	21.867	21.7426	21.9915
1997.81	23.7426	23.5791	23.9061		1830	22.5095	22.4266	22.5924
1997.72	23.7313	23.5691	23.8936		1829	22.119	22.0162	22.2217
1997.64	23.7303	23.5681	23.8925		1828	21.9136	21.7935	22.0337
1997.56	23.7413	23.5779	23.9046		1827	21.5768	21.4231	21.7305
1997.47	23.7797	23.6122	23.9473		1826	21.6663	21.522	21.8107
1997.39	23.8225	23.6502	23.9948		1825	21.8343	21.7067	21.9618
1997.31	23.8212	23.6491	23.9933		1824	22.5726	22.4906	22.6546
1997.22	23.7997	23.63	23.9695		1823	22.3469	22.2585	22.4354
1997.14	23.7659	23.5998	23.9319		1822	22.0542	21.9463	22.162
1997.06	23.7084	23.5486	23.8682		1821	22.2941	22.2029	22.3852
1996.97	23.6673	23.5119	23.8227		1820	22.4645	22.3805	22.5484
1996.89	23.7181	23.5573	23.879		1819	22.3194	22.2296	22.4092
1996.81	23.7478	23.5837	23.9119		1818	21.6999	21.559	21.8408
1996.72	23.763	23.5973	23.9288		1817	22.3983	22.3121	22.4845
1996.64	23.8158	23.6443	23.9874		1816	22.0536	21.9457	22.1615
1996.56	23.8696	23.6922	24.0471		1815	21.4387	21.2701	21.6074
1996.47	23.8124	23.6412	23.9835		1814	22.6691	22.5869	22.7512
1996.39	23.8099	23.639	23.9807		1813	22.6401	22.5582	22.722
1996.31	23.8067	23.6362	23.9772		1812	22.1614	22.0618	22.261
1996.22	23.7725	23.6058	23.9393		1811	21.7425	21.6059	21.8791
1996.14	23.7586	23.5934	23.9239		1810	22.822	22.7361	22.9079
1996.06	23.7578	23.5927	23.923		1809	22.7934	22.7085	22.8782
1995.97	23.7325	23.5701	23.8949		1808	22.7524	22.6688	22.8361
1995.89	23.7195	23.5585	23.8805		1807	22.5963	22.5145	22.6782
1995.81	23.7439	23.5802	23.9075		1806	22.3372	22.2483	22.4261
1995.72	23.713	23.5527	23.8732		1805	22.6413	22.5594	22.7232
1995.64	23.6798	23.5231	23.8366		1804	23.2523	23.1378	23.3668
1995.56	23.6556	23.5014	23.8098		1803	22.4393	22.3546	22.5241
1995.47	23.6594	23.5048	23.8139		1802	22.4493	22.3649	22.5337
1995.39	23.6485	23.4951	23.8019		1801	22.4035	22.3176	22.4895
1995.31	23.6697	23.5141	23.8254		1800	22.8187	22.733	22.9045
1995.22	23.7105	23.5505	23.8705		1799	22.9198	22.8294	23.0102
1995.14	23.7593	23.594	23.9246		1798	22.5389	22.4565	22.6213
1995.06	23.8098	23.6389	23.9806		1797	22.7866	22.7019	22.8712
1994.97	23.7965	23.6271	23.9659		1796	23.1251	23.0212	23.229
1994.89	23.7953	23.626	23.9646		1795	23.1673	23.06	23.2746
1994.81	23.7381	23.5751	23.9011		1794	23.2041	23.0937	23.3144
1994.72	23.7739	23.607	23.9409		1793	22.9579	22.8654	23.0504
1994.64	23.8166	23.645	23.9883		1792	22.7013	22.6187	22.7839
1994.56	23.8642	23.6873	24.0411		1791	22.3444	22.2558	22.4329
1994.47	23.8711	23.6935	24.0487		1790	23.2619	23.1466	23.3772
1994.39	23.9353	23.7504	24.1201		1789	23.0854	22.9844	23.1863
1994.31	23.8704	23.6928	24.0479		1788	23.0955	22.9938	23.1972
1994.22	23.7974	23.6279	23.9669		1787	22.8802	22.7918	22.9685
1994.14	23.812	23.6409	23.9831		1786	22.9658	22.8729	23.0588
1994.06	23.7761	23.609	23.9433		1785	23.1641	23.0571	23.2711
1993.97	23.8175	23.6458	23.9893		1784	23.0292	22.9322	23.1262
1993.89	23.8098	23.639	23.9807		1783	22.8339	22.7475	22.9202
1993.81	23.8158	23.6443	23.9873		1782	23.1544	23.0482	23.2607
1993.72	23.6843	23.5271	23.8415		1781	22.872	22.784	22.96
1993.64	23.6181	23.4679	23.7683		1780	22.7788	22.6944	22.8632
1993.56	23.5165	23.3768	23.6562		1779	22.943	22.8514	23.0347
1993.47	23.5471	23.4043	23.6899		1778	23.1262	23.0221	23.2302
1993.39	23.5278	23.3869	23.6686		1777	22.8217	22.7359	22.9076
1993.31	23.5489	23.4059	23.6918		1776	23.08	22.9794	23.1805
1993.22	23.5686	23.4235	23.7136		1775	23.1318	23.0274	23.2363
1993.14	23.5891	23.442	23.7363		1774	22.6596	22.5775	22.7416
1993.06	23.5475	23.4046	23.6903		1773	22.8747	22.7866	22.9628
1992.97	23.4358	23.3042	23.5674		1772	23.1733	23.0656	23.2811
1992.89	23.4578	23.324	23.5916		1771	23.0496	22.9512	23.148
1992.81	23.4638	23.3294	23.5981		1770	22.7982	22.7132	22.8832
1992.72	23.482	23.3458	23.6182		1769	23.0777	22.9773	23.1781
1992.64	23.5338	23.3923	23.6752		1768	23.3405	23.218	23.4629
1992.56	23.67	23.5143	23.8257		1767	23.1864	23.0776	23.2953
1992.47	23.6922	23.5342	23.8503		1766	23.3686	23.2435	23.4937
1992.39	23.7258	23.5641	23.8875		1765	23.4112	23.282	23.5404
1992.31	23.6824	23.5254	23.8395		1764	23.3725	23.247	23.498
1992.22	23.6101	23.4607	23.7594		1763	23.2408	23.1273	23.3543
1992.14	23.5502	23.4071	23.6934		1762	23.4922	23.355	23.6295
1992.06	23.5677	23.4228	23.7127		1761	23.4191	23.2891	23.5491
1991.97	23.6051	23.4562	23.7539		1760	23.4009	23.2727	23.5291
1991.89	23.602	23.4535	23.7505		1759	23.5785	23.4324	23.7245
1991.81	23.5781	23.4321	23.7241		1758	23.5551	23.4115	23.6987
1991.72	23.6175	23.4674	23.7676		1757	23.5862	23.4394	23.7331
1991.64	23.6353	23.4833	23.7873		1756	23.2867	23.1692	23.4042
1991.56	23.6098	23.4605	23.7591		1755	23.1411	23.0359	23.2463
1991.47	23.573	23.4275	23.7184		1754	22.7095	22.6268	22.7922
1991.39	23.5987	23.4505	23.7468		1753	22.7747	22.6904	22.859
1991.31	23.6091	23.4598	23.7583		1752	22.8985	22.8093	22.9878
1991.22	23.5654	23.4207	23.7101		1751	22.9941	22.8994	23.0888
1991.14	23.5175	23.3777	23.6572		1750	23.0188	22.9225	23.1151
1991.06	23.6011	23.4527	23.7495		1749	23.0526	22.954	23.1512
1990.97	23.5976	23.4495	23.7456		1748	22.4232	22.3379	22.5085
1990.89	23.5688	23.4237	23.7138		1747	22.933	22.8419	23.0241
1990.81	23.5595	23.4154	23.7036		1746	23.703	23.5438	23.8622
1990.72	23.5669	23.4221	23.7117		1745	23.8798	23.7012	24.0585
1990.64	23.5345	23.393	23.676		1744	23.7948	23.6256	23.964
1990.56	23.5539	23.4104	23.6974		1743	23.7001	23.5412	23.859
1990.47	23.4955	23.3579	23.633		1742	23.8981	23.7174	24.0788
1990.39	23.4739	23.3385	23.6093		1741	23.5737	23.4281	23.7192
1990.31	23.4697	23.3348	23.6047		1740	23.6006	23.4523	23.749
1990.22	23.4104	23.2813	23.5395		1739	23.9749	23.7856	24.1642
1990.14	23.3378	23.2156	23.46		1738	24.0036	23.811	24.1961
1990.06	23.3424	23.2197	23.465		1737	23.9044	23.723	24.0857
1989.97	23.2019	23.0917	23.312		1736	23.4502	23.3172	23.5833
1989.89	23.1707	23.0631	23.2782		1735	23.5498	23.4067	23.6929
1989.81	23.197	23.0873	23.3068		1734	23.4256	23.295	23.5562
1989.72	23.2544	23.1397	23.369		1733	23.24	23.1266	23.3534
1989.64	23.2512	23.1369	23.3656		1732	23.8612	23.6846	24.0377
1989.56	23.3242	23.2032	23.4451		1731	23.7618	23.5962	23.9274
1989.47	23.297	23.1785	23.4154		1730	23.6605	23.5058	23.8151
1989.39	23.3232	23.2023	23.4441		1729	23.4152	23.2856	23.5448
1989.31	23.3708	23.2455	23.4961		1728	23.3491	23.2258	23.4724
1989.22	23.4512	23.3181	23.5843		1727	23.151	23.045	23.2569
1989.14	23.5347	23.3932	23.6763		1726	23.2885	23.1708	23.4062
1989.06	23.6321	23.4804	23.7838		1725	23.175	23.0671	23.2829
1988.97	23.6668	23.5114	23.8221		1724	23.1977	23.0879	23.3075
1988.89	23.6886	23.5309	23.8463		1723	23.1144	23.0113	23.2175
1988.81	23.6839	23.5267	23.8411		1722	23.2559	23.1411	23.3707
1988.72	23.7266	23.5648	23.8884		1721	23.0139	22.9179	23.1099
1988.64	23.7579	23.5927	23.9231		1720	23.0982	22.9963	23.2001
1988.56	23.7714	23.6048	23.938		1719	23.3409	23.2184	23.4634
1988.47	23.7438	23.5802	23.9075		1718	23.2377	23.1245	23.3509
1988.39	23.7665	23.6004	23.9326		1717	23.8926	23.7125	24.0726
1988.31	23.7679	23.6017	23.9342		1716	23.8153	23.6438	23.9867
1988.22	23.7554	23.5905	23.9203		1715	23.9319	23.7474	24.1163
1988.14	23.7407	23.5774	23.904		1714	24.0085	23.8154	24.2016
1988.06	23.7625	23.5968	23.9282		1713	23.6215	23.4709	23.772
1987.97	23.7417	23.5783	23.9051		1712	24.3212	24.092	24.5504
1987.89	23.7399	23.5767	23.9031		1711	24.3849	24.1482	24.6216
1987.81	23.7239	23.5624	23.8853		1710	24.3647	24.1304	24.5991
1987.72	23.7242	23.5627	23.8857		1709	24.0283	23.8329	24.2237
1987.64	23.7004	23.5415	23.8594		1708	24.171	23.9592	24.3827
1987.56	23.6888	23.5311	23.8465		1707	23.8858	23.7065	24.0651
1987.47	23.6523	23.4985	23.8061		1706	23.7891	23.6205	23.9576
1987.39	23.6418	23.4891	23.7945		1705	23.9557	23.7686	24.1429
1987.31	23.6145	23.4647	23.7643		1704	23.8721	23.6943	24.0498
1987.22	23.5859	23.4391	23.7327		1703	23.5626	23.4182	23.707
1987.14	23.576	23.4302	23.7218		1702	23.9371	23.752	24.1221
1987.06	23.5799	23.4337	23.7261		1701	24.1775	23.965	24.39
1986.97	23.586	23.4391	23.7328		1700	23.9915	23.8003	24.1826
1986.89	23.6246	23.4737	23.7755		1699	23.7791	23.6116	23.9466
1986.81	23.6151	23.4652	23.765		1698	23.8424	23.6679	24.0168
1986.72	23.6361	23.484	23.7882		1697	23.6295	23.4781	23.7809
1986.64	23.6464	23.4932	23.7995		1696	23.7478	23.5837	23.9118
1986.56	23.6453	23.4922	23.7984		1695	23.8783	23.6999	24.0568
1986.47	23.6423	23.4896	23.7951		1694	23.979	23.7892	24.1688
1986.39	23.6518	23.4981	23.8056		1693	24.0382	23.8417	24.2347
1986.31	23.6301	23.4786	23.7815		1692	23.871	23.6934	24.0486
1986.22	23.6393	23.4869	23.7918		1691	23.6333	23.4815	23.7851
1986.14	23.6428	23.49	23.7956		1690	23.7654	23.5994	23.9314
1986.06	23.637	23.4848	23.7892		1689	24.2211	24.0035	24.4386
1985.97	23.6535	23.4996	23.8074		1688	24.2661	24.0433	24.4888
1985.89	23.632	23.4803	23.7836		1687	24.2836	24.0588	24.5084
1985.81	23.606	23.4571	23.7549		1686	24.2065	23.9906	24.4223
1985.72	23.5964	23.4485	23.7443		1685	24.1552	23.9453	24.3651
1985.64	23.568	23.4231	23.713		1684	24.0634	23.864	24.2627
1985.56	23.5535	23.41	23.6969		1683	23.7035	23.5442	23.8627
1985.47	23.5751	23.4294	23.7208		1682	23.8197	23.6477	23.9916
1985.39	23.5872	23.4403	23.7342		1681	23.8596	23.6833	24.036
1985.31	23.6217	23.4711	23.7722		1680	23.6879	23.5303	23.8455
1985.22	23.663	23.508	23.8179		1679	23.7122	23.552	23.8724
1985.14	23.6854	23.5281	23.8428		1678	23.9995	23.8074	24.1916
1985.06	23.6014	23.4529	23.7498		1677	24.0967	23.8936	24.2999
1984.97	23.6207	23.4703	23.7712		1676	24.0508	23.8528	24.2487
1984.89	23.5925	23.445	23.74		1675	24.1939	23.9795	24.4083
1984.81	23.5546	23.411	23.6982		1674	24.1463	23.9374	24.3552
1984.72	23.5444	23.4019	23.687		1673	24.0128	23.8192	24.2064
1984.64	23.6275	23.4763	23.7786		1672	23.8462	23.6714	24.0211
1984.56	23.5674	23.4225	23.7123		1671	23.9633	23.7753	24.1513
1984.47	23.4886	23.3517	23.6254		1670	23.6689	23.5133	23.8244
1984.39	23.4566	23.323	23.5903		1669	24.3206	24.0914	24.5498
1984.31	23.4023	23.274	23.5306		1668	24.1824	23.9694	24.3955
1984.22	23.3436	23.2208	23.4663		1667	23.9152	23.7327	24.0978
1984.14	23.3286	23.2072	23.4499		1666	23.7228	23.5615	23.8842
1984.06	23.3345	23.2126	23.4564		1665	23.6318	23.4802	23.7835
1983.97	23.3705	23.2452	23.4958		1664	23.9852	23.7947	24.1756
1983.89	23.3408	23.2183	23.4633		1663	23.6965	23.538	23.855
1983.81	23.2734	23.1571	23.3897		1662	24.0255	23.8304	24.2205
1983.72	23.1218	23.0181	23.2255		1661	23.7491	23.5849	23.9133
1983.64	22.9634	22.8706	23.0562		1660	23.7979	23.6284	23.9675
1983.56	22.7296	22.6465	22.8127		1659	23.6669	23.5115	23.8223
1983.47	22.5715	22.4895	22.6535		1658	23.6619	23.507	23.8167
1983.39	22.5277	22.4452	22.6103		1657	23.6216	23.471	23.7721
1983.31	22.5818	22.4999	22.6637		1656	23.617	23.4669	23.7671
1983.22	22.6785	22.5963	22.7607		1655	23.6417	23.489	23.7944
1983.14	22.8177	22.732	22.9034		1654	23.8972	23.7167	24.0778
1983.06	22.9944	22.8997	23.0891		1653	23.8396	23.6655	24.0138
1982.97	23.0792	22.9787	23.1797		1652	23.9247	23.7411	24.1083
1982.89	23.1712	23.0635	23.2788		1651	23.9377	23.7526	24.1228
1982.81	23.2413	23.1278	23.3548		1650	23.6587	23.5042	23.8132
1982.72	23.2965	23.1781	23.4149		1649	23.6325	23.4808	23.7842
1982.64	23.3007	23.1819	23.4195		1648	23.6113	23.4618	23.7608
1982.56	23.3194	23.1989	23.4399		1647	24.08	23.8787	24.2812
1982.47	23.3176	23.1972	23.4379		1646	23.4917	23.3545	23.6289
1982.39	23.2944	23.1761	23.4126		1645	23.4532	23.3199	23.5866
1982.31	23.2718	23.1556	23.388		1644	23.9167	23.7339	24.0994
1982.22	23.2905	23.1726	23.4084		1643	24.0358	23.8396	24.232
1982.14	23.3028	23.1838	23.4218		1642	23.9399	23.7546	24.1253
1982.06	23.2601	23.1449	23.3753		1641	23.6514	23.4977	23.8052
1981.97	23.2064	23.0959	23.3169		1640	24.4689	24.2223	24.7156
1981.89	23.1197	23.0162	23.2233		1639	24.1555	23.9455	24.3655
1981.81	22.9795	22.8857	23.0732		1638	23.9139	23.7315	24.0964
1981.72	22.8849	22.7963	22.9734		1637	23.8532	23.6776	24.0289
1981.64	22.8509	22.7639	22.938		1636	24.0652	23.8657	24.2648
1981.56	22.8604	22.7729	22.9478		1635	24.1018	23.8981	24.3056
1981.47	22.8794	22.7911	22.9678		1634	23.8044	23.6342	23.9747
1981.39	22.9676	22.8745	23.0607		1633	23.7223	23.561	23.8836
1981.31	23.0476	22.9493	23.1458		1632	24.2285	24.01	24.4469
1981.22	23.1066	23.004	23.2091		1631	23.8865	23.7071	24.0659
1981.14	23.1354	23.0307	23.2402		1630	24.1349	23.9273	24.3425
1981.06	23.1335	23.0289	23.2381		1629	24.0738	23.8733	24.2744
1980.97	23.1604	23.0537	23.2671		1628	23.8654	23.6884	24.0425
1980.89	23.1622	23.0554	23.2691		1627	23.7453	23.5815	23.9091
1980.81	23.1774	23.0693	23.2855		1626	24.1251	23.9186	24.3315
1980.72	23.2152	23.1039	23.3265		1625	24.2678	24.0448	24.4908
1980.64	23.2937	23.1755	23.4119		1624	24.0581	23.8594	24.2569
1980.56	23.3198	23.1993	23.4404		1623	24.1393	23.9312	24.3474
1980.47	23.3339	23.2121	23.4558		1622	24.2661	24.0433	24.4889
1980.39	23.3231	23.2023	23.444		1621	24.0783	23.8773	24.2794
1980.31	23.3482	23.225	23.4714		1620	23.9992	23.8072	24.1913
1980.22	23.3565	23.2326	23.4805		1619	24.2738	24.0501	24.4975
1980.14	23.3402	23.2177	23.4626		1618	24.1885	23.9748	24.4023
1980.06	23.399	23.271	23.527		1617	24.0176	23.8234	24.2117
1979.97	23.4825	23.3462	23.6187		1616	23.8136	23.6423	23.9849
1979.89	23.4555	23.322	23.5891		1615	23.7825	23.6146	23.9503
1979.81	23.4327	23.3014	23.564		1614	23.8586	23.6824	24.0349
1979.72	23.4641	23.3297	23.5985		1613	23.9151	23.7325	24.0976
1979.64	23.4706	23.3356	23.6057		1612	23.975	23.7857	24.1643
1979.56	23.4639	23.3295	23.5983		1611	24.2715	24.0481	24.4949
1979.47	23.5065	23.3679	23.6452		1610	24.2371	24.0177	24.4566
1979.39	23.55	23.4069	23.6931		1609	23.7448	23.581	23.9085
1979.31	23.5149	23.3754	23.6545		1608	23.5519	23.4086	23.6952
1979.22	23.4196	23.2896	23.5496		1607	23.6964	23.5379	23.8549
1979.14	23.3043	23.1852	23.4235		1606	23.8097	23.6388	23.9805
1979.06	23.1608	23.054	23.2676		1605	23.6454	23.4923	23.7984
1978.97	23.0254	22.9286	23.1221		1604	24.2984	24.0718	24.525
1978.89	22.9141	22.8241	23.0042		1603	23.9832	23.7929	24.1734
1978.81	22.7845	22.6999	22.869		1602	23.8044	23.6341	23.9746
1978.72	22.6784	22.5962	22.7606		1601	23.9578	23.7704	24.1451
1978.64	22.6558	22.5738	22.7378		1600	23.7196	23.5586	23.8806
1978.56	22.6442	22.5623	22.7261		1599	23.7315	23.5692	23.8938
1978.47	22.63	22.5482	22.7119		1598	23.9232	23.7397	24.1067
1978.39	22.6841	22.6018	22.7664		1597	23.8921	23.7121	24.0721
1978.31	22.7576	22.6738	22.8413		1596	23.6155	23.4656	23.7654
1978.22	22.8152	22.7296	22.9008		1595	23.7002	23.5413	23.8592
1978.14	22.8685	22.7807	22.9564		1594	23.8435	23.6689	24.0181
1978.06	22.9667	22.8737	23.0597		1593	23.7706	23.6041	23.9372
1977.97	23.0887	22.9875	23.1899		1592	23.7646	23.5987	23.9305
1977.89	23.2101	23.0993	23.321		1591	23.7325	23.5701	23.8949
1977.81	23.3455	23.2226	23.4684		1590	23.596	23.4481	23.7438
1977.72	23.4811	23.345	23.6172		1589	24.0397	23.8431	24.2364
1977.64	23.5843	23.4377	23.731		1588	24.0457	23.8483	24.243
1977.56	23.6318	23.4802	23.7834		1587	24.0279	23.8326	24.2232
1977.47	23.6477	23.4944	23.8011		1586	24.0318	23.836	24.2275
1977.39	23.6492	23.4957	23.8027		1585	23.8188	23.647	23.9907
1977.31	23.6033	23.4547	23.752		1584	23.873	23.6952	24.0509
1977.22	23.5506	23.4074	23.6937		1583	23.8169	23.6452	23.9885
1977.14	23.5611	23.4169	23.7054		1582	24.0249	23.8299	24.2199
1977.06	23.5164	23.3767	23.656		1581	24.0367	23.8404	24.233
1976.97	23.4828	23.3466	23.6191		1580	23.8482	23.6731	24.0233
1976.89	23.4996	23.3616	23.6375		1579	23.6794	23.5227	23.836
1976.81	23.5334	23.392	23.6748		1578	23.8738	23.6958	24.0517
1976.72	23.5354	23.3938	23.677		1577	23.6998	23.5409	23.8587
1976.64	23.5932	23.4457	23.7408		1576	23.4498	23.3168	23.5828
1976.56	23.6397	23.4872	23.7922		1575	23.3492	23.2259	23.4725
1976.47	23.7045	23.5451	23.8639		1574	23.6495	23.496	23.803
1976.39	23.6961	23.5377	23.8546		1573	23.6304	23.479	23.7819
1976.31	23.6631	23.5082	23.8181		1572	23.7905	23.6218	23.9593
1976.22	23.6685	23.513	23.824		1571	23.4669	23.3322	23.6016
1976.14	23.6951	23.5367	23.8535		1570	23.6763	23.5199	23.8327
1976.06	23.709	23.5491	23.8689		1569	23.6827	23.5256	23.8397
1975.97	23.7583	23.5931	23.9235		1568	23.6082	23.459	23.7573
1975.89	23.7997	23.63	23.9695		1567	23.8686	23.6913	24.046
1975.81	23.7861	23.6178	23.9543		1566	23.8781	23.6996	24.0565
1975.72	23.7282	23.5663	23.8901		1565	23.7964	23.627	23.9657
1975.64	23.6614	23.5066	23.8162		1564	23.2946	23.1764	23.4129
1975.56	23.64	23.4875	23.7925		1563	23.2185	23.1069	23.33
1975.47	23.6117	23.4622	23.7613		1562	23.3733	23.2478	23.4989
1975.39	23.5974	23.4494	23.7454		1561	23.4383	23.3065	23.5702
1975.31	23.6241	23.4733	23.7749		1560	23.1426	23.0373	23.2479
1975.22	23.6268	23.4757	23.7779		1559	23.103	23.0008	23.2053
1975.14	23.5671	23.4223	23.712		1558	23.0766	22.9763	23.1769
1975.06	23.475	23.3395	23.6105		1557	23.0494	22.951	23.1477
1974.97	23.4404	23.3083	23.5724		1556	23.1321	23.0277	23.2366
1974.89	23.4522	23.3189	23.5854		1555	23.186	23.0772	23.2949
1974.81	23.5137	23.3743	23.653		1554	23.1202	23.0167	23.2238
1974.72	23.6294	23.4781	23.7808		1553	23.0899	22.9886	23.1912
1974.64	23.7335	23.571	23.896		1552	23.1286	23.0244	23.2328
1974.56	23.7336	23.5711	23.8961		1551	23.6526	23.4987	23.8064
1974.47	23.6301	23.4786	23.7815		1550	23.6334	23.4816	23.7852
1974.39	23.4553	23.3218	23.5888		1549	23.8454	23.6706	24.0202
1974.31	23.2985	23.1799	23.4171		1548	23.7859	23.6177	23.9542
1974.22	23.2255	23.1133	23.3376		1547	23.8758	23.6976	24.054
1974.14	23.2019	23.0917	23.312		1546	23.8644	23.6875	24.0413
1974.06	23.2348	23.1218	23.3477		1545	23.8048	23.6345	23.9751
1973.97	23.3141	23.194	23.4341		1544	24.0165	23.8225	24.2106
1973.89	23.3935	23.266	23.521		1543	23.9112	23.7291	24.0933
1973.81	23.4517	23.3186	23.5849		1542	23.9506	23.764	24.1371
1973.72	23.5071	23.3684	23.6458		1541	23.7816	23.6139	23.9494
1973.64	23.5264	23.3857	23.6671		1540	23.6067	23.4577	23.7556
1973.56	23.5387	23.3967	23.6806		1539	23.878	23.6996	24.0564
1973.47	23.535	23.3934	23.6766		1538	23.8179	23.6462	23.9897
1973.39	23.539	23.397	23.6809		1537	23.363	23.2384	23.4876
1973.31	23.5937	23.4461	23.7413		1536	23.3384	23.2161	23.4607
1973.22	23.6657	23.5105	23.8209		1535	23.7769	23.6097	23.9442
1973.14	23.681	23.5241	23.8378		1534	23.7653	23.5993	23.9313
1973.06	23.6574	23.503	23.8117		1533	24.1132	23.9081	24.3182
1972.97	23.612	23.4625	23.7616		1532	24.0118	23.8183	24.2053
1972.89	23.5513	23.408	23.6945		1531	23.6628	23.5078	23.8177
1972.81	23.4212	23.291	23.5514		1530	23.861	23.6845	24.0375
1972.72	23.3159	23.1957	23.4361		1529	23.8755	23.6974	24.0537
1972.64	23.2438	23.13	23.3575		1528	23.0997	22.9977	23.2017
1972.56	23.1899	23.0808	23.2991		1527	23.1389	23.0338	23.2439
1972.47	23.1163	23.013	23.2195		1526	23.3118	23.192	23.4316
1972.39	23.2646	23.149	23.3801		1525	23.6156	23.4657	23.7656
1972.31	23.4781	23.3423	23.6139		1524	23.8585	23.6823	24.0347
1972.22	23.6139	23.4641	23.7636		1523	23.9141	23.7317	24.0966
1972.14	23.668	23.5126	23.8235		1522	23.8212	23.6491	23.9934
1972.06	23.7149	23.5544	23.8755		1521	23.5641	23.4195	23.7086
1971.97	23.6432	23.4904	23.796		1520	23.3916	23.2643	23.5189
1971.89	23.5656	23.4209	23.7103		1519	23.2025	23.0923	23.3127
1971.81	23.6114	23.4619	23.7609		1518	23.185	23.0762	23.2937
1971.72	23.6803	23.5235	23.8371		1517	23.9131	23.7307	24.0954
1971.64	23.7524	23.5879	23.917		1516	23.794	23.6249	23.9631
1971.56	23.7848	23.6167	23.9529		1515	23.6072	23.4582	23.7563
1971.47	23.7681	23.6018	23.9344		1514	23.8487	23.6736	24.0239
1971.39	23.6769	23.5205	23.8334		1513	23.3239	23.203	23.4449
1971.31	23.6083	23.4591	23.7574		1512	23.3535	23.2298	23.4772
1971.22	23.5081	23.3693	23.6469		1511	23.2964	23.178	23.4148
1971.14	23.3978	23.2699	23.5257		1510	23.7776	23.6103	23.9449
1971.06	23.2927	23.1746	23.4107		1509	23.7001	23.5412	23.859
1970.97	23.2972	23.1788	23.4157		1508	23.9082	23.7264	24.09
1970.89	23.3726	23.2471	23.4981		1507	23.8788	23.7003	24.0573
1970.81	23.4618	23.3276	23.5959		1506	23.9213	23.7381	24.1046
1970.72	23.4917	23.3545	23.6288		1505	23.7584	23.5932	23.9236
1970.64	23.4996	23.3617	23.6376		1504	23.8849	23.7057	24.0641
1970.56	23.4323	23.301	23.5635		1503	24.0465	23.8491	24.244
1970.47	23.2841	23.1668	23.4014		1502	24.1318	23.9245	24.339
1970.39	23.1243	23.0204	23.2282		1501	24.0083	23.8152	24.2014
1970.31	23.0777	22.9773	23.1781		1500	23.9435	23.7578	24.1293
1970.22	23.1224	23.0187	23.2261		1499	24.1508	23.9414	24.3602
1970.14	23.2199	23.1083	23.3316		1498	23.8788	23.7003	24.0573
1970.06	23.3788	23.2528	23.5049		1497	23.6499	23.4964	23.8035
1969.97	23.5398	23.3978	23.6819		1496	23.6336	23.4818	23.7855
1969.89	23.3599	23.2356	23.4842		1495	23.5933	23.4457	23.7409
1969.81	23.169	23.0615	23.2764		1494	23.7452	23.5814	23.909
1969.72	22.9669	22.8739	23.06		1493	24.2271	24.0088	24.4453
1969.64	22.7832	22.6986	22.8677		1492	24.2487	24.028	24.4695
1969.56	22.6594	22.5774	22.7414		1491	23.7658	23.5998	23.9319
1969.47	22.86	22.7726	22.9475		1490	23.6273	23.4762	23.7785
1969.39	23.0573	22.9584	23.1562		1489	23.8691	23.6917	24.0465
1969.31	23.2244	23.1123	23.3364		1488	23.8642	23.6873	24.041
1969.22	23.3648	23.2401	23.4896		1487	23.78	23.6124	23.9476
1969.14	23.4683	23.3335	23.6032		1486	23.6456	23.4925	23.7987
1969.06	23.5256	23.385	23.6662		1485	24.0037	23.8111	24.1962
1968.97	23.5449	23.4024	23.6875		1484	23.6101	23.4607	23.7594
1968.89	23.5402	23.3981	23.6823		1483	23.7868	23.6185	23.9551
1968.81	23.5075	23.3687	23.6463		1482	23.905	23.7235	24.0864
1968.72	23.4667	23.3321	23.6014		1481	23.668	23.5125	23.8235
1968.64	23.4349	23.3034	23.5664		1480	23.4938	23.3565	23.6312
1968.56	23.3978	23.2699	23.5257		1479	23.626	23.475	23.777
1968.47	23.3554	23.2315	23.4793		1478	23.6596	23.505	23.8142
1968.39	23.3391	23.2167	23.4614		1477	23.7045	23.5451	23.8639
1968.31	23.3454	23.2224	23.4683		1476	23.8347	23.6611	24.0083
1968.22	23.3465	23.2235	23.4695		1475	23.7169	23.5562	23.8776
1968.14	23.3226	23.2018	23.4434		1474	23.5519	23.4086	23.6952
1968.06	23.3059	23.1866	23.4252		1473	23.3534	23.2297	23.477
1967.97	23.3193	23.1988	23.4398		1472	23.7667	23.6006	23.9329
1967.89	23.3711	23.2457	23.4964		1471	23.7985	23.6289	23.9681
1967.81	23.4824	23.3462	23.6187		1470	23.8999	23.719	24.0807
1967.72	23.6165	23.4665	23.7665		1469	23.9118	23.7296	24.094
1967.64	23.6483	23.4949	23.8017		1468	23.5343	23.3928	23.6758
1967.56	23.4921	23.3549	23.6293		1467	23.6376	23.4854	23.7898
1967.47	23.3422	23.2196	23.4649		1466	23.6814	23.5245	23.8383
1967.39	23.2024	23.0922	23.3126		1465	23.3368	23.2146	23.4589
1967.31	23.0257	22.929	23.1225		1464	23.4702	23.3352	23.6052
1967.22	22.8104	22.725	22.8959		1463	23.6645	23.5094	23.8196
1967.14	22.7424	22.659	22.8258		1462	23.9105	23.7285	24.0925
1967.06	22.5819	22.4999	22.6638		1461	23.7783	23.6109	23.9456
1966.97	22.55	22.4678	22.6322		1460	23.658	23.5036	23.8124
1966.89	22.5461	22.4638	22.6284		1459	23.7072	23.5475	23.8669
1966.81	22.8601	22.7726	22.9475		1458	23.8545	23.6787	24.0303
1966.72	23.1644	23.0573	23.2714		1457	23.9035	23.7222	24.0848
1966.64	23.4398	23.3078	23.5718		1456	23.5876	23.4406	23.7346
1966.56	23.4694	23.3345	23.6043
1966.47	23.4552	23.3217	23.5887
1966.39	23.204	23.0937	23.3143
1966.31	22.9068	22.8171	22.9965
1966.22	22.6301	22.5483	22.712
1966.14	22.4151	22.3296	22.5007
1966.06	22.36	22.2722	22.4479
1965.97	22.3631	22.2754	22.4508
1965.89	22.522	22.4393	22.6046
1965.81	22.8172	22.7315	22.9029
1965.72	23.1453	23.0398	23.2508
1965.64	23.3688	23.2437	23.4939
1965.56	23.565	23.4203	23.7096
1965.47	23.6447	23.4917	23.7977
1965.39	23.5867	23.4398	23.7336
1965.31	23.4211	23.2909	23.5513
1965.22	23.2102	23.0994	23.3211
1965.14	23.0465	22.9484	23.1447
1965.06	22.9955	22.9007	23.0902
1964.97	23.0569	22.958	23.1558
1964.89	23.248	23.1339	23.3621
1964.81	23.4941	23.3567	23.6315
1964.72	23.707	23.5473	23.8666
1964.64	23.821	23.6489	23.993
1964.56	23.8503	23.6749	24.0256
1964.47	23.81	23.6391	23.9808
1964.39	23.7522	23.5876	23.9167
1964.31	23.6088	23.4596	23.758
1964.22	23.3658	23.241	23.4907
1964.14	22.9991	22.9041	23.0941
1964.06	22.8304	22.7442	22.9166
1963.97	22.7728	22.6886	22.857
1963.89	22.7985	22.7135	22.8835
1963.81	22.9547	22.8624	23.047
1963.72	23.218	23.1065	23.3295
1963.64	23.2361	23.1231	23.3492
1963.56	23.0201	22.9237	23.1164
1963.47	22.7726	22.6884	22.8568
1963.39	22.4859	22.4025	22.5693
1963.31	22.2412	22.1469	22.3355
1963.22	22.0612	21.954	22.1685
1963.14	22.0115	21.9001	22.123
1963.06	22.024	21.9136	22.1344
1962.97	22.1932	22.0958	22.2906
1962.89	22.3828	22.296	22.4696
1962.81	22.6306	22.5488	22.7125
1962.72	22.8311	22.7449	22.9174
1962.64	22.9673	22.8742	23.0603
1962.56	22.9219	22.8314	23.0123
1962.47	22.8213	22.7355	22.9072
1962.39	22.647	22.565	22.7289
1962.31	22.5481	22.4658	22.6303
1962.22	22.4689	22.385	22.5527
1962.14	22.4402	22.3555	22.5249
1962.06	22.4693	22.3854	22.5531
1961.97	22.5366	22.4542	22.619
1961.89	22.5721	22.4901	22.6541
1961.81	22.7382	22.6549	22.8215
1961.72	22.845	22.7582	22.9318
1961.64	22.9529	22.8607	23.0452
1961.56	23.0297	22.9327	23.1268
1961.47	23.1067	23.0041	23.2092
1961.39	23.0544	22.9557	23.1531
1961.31	23.0507	22.9522	23.1491
1961.22	23.0042	22.9089	23.0996
1961.14	22.9453	22.8535	23.0371
1961.06	22.9584	22.8659	23.051
1960.97	23.003	22.9078	23.0983
1960.89	23.1009	22.9988	23.203
1960.81	23.2738	23.1574	23.3902
1960.72	23.4571	23.3234	23.5908
1960.64	23.583	23.4365	23.7295
1960.56	23.6863	23.5288	23.8437
1960.47	23.7068	23.5471	23.8664
1960.39	23.6293	23.4779	23.7807
1960.31	23.5109	23.3718	23.65
1960.22	23.3724	23.2469	23.4978
1960.14	23.1828	23.0743	23.2914
1960.06	23.1065	23.004	23.209
1959.97	23.0821	22.9814	23.1828
1959.89	23.0981	22.9962	23.1999
1959.81	23.1535	23.0473	23.2597
1959.72	23.2601	23.1449	23.3753
1959.64	23.2725	23.1562	23.3887
1959.56	23.2701	23.154	23.3861
1959.47	23.2591	23.144	23.3741
1959.39	23.2082	23.0975	23.3189
1959.31	23.159	23.0523	23.2656
1959.22	23.1027	23.0005	23.205
1959.14	23.0001	22.905	23.0951
1959.06	22.9933	22.8987	23.088
1958.97	22.993	22.8984	23.0876
1958.89	23.0802	22.9796	23.1807
1958.81	23.2262	23.114	23.3384
1958.72	23.4053	23.2767	23.534
1958.64	23.437	23.3052	23.5687
1958.56	23.4729	23.3376	23.6082
1958.47	23.4017	23.2734	23.53
1958.39	23.3124	23.1926	23.4323
1958.31	23.228	23.1157	23.3404
1958.22	23.194	23.0845	23.3034
1958.14	23.1299	23.0256	23.2342
1958.06	23.1517	23.0457	23.2578
1957.97	23.2008	23.0907	23.3108
1957.89	23.2844	23.167	23.4017
1957.81	23.3913	23.264	23.5186
1957.72	23.537	23.3952	23.6788
1957.64	23.6291	23.4778	23.7805
1957.56	23.6601	23.5055	23.8147
1957.47	23.6427	23.4899	23.7955
1957.39	23.5991	23.4509	23.7473
1957.31	23.5359	23.3942	23.6775
1957.22	23.4374	23.3056	23.5691
1957.14	23.3508	23.2274	23.4742
1957.06	23.3101	23.1905	23.4298
1956.97	23.2913	23.1733	23.4092
1956.89	23.3317	23.21	23.4533
1956.81	23.4782	23.3424	23.614
1956.72	23.508	23.3692	23.6468
1956.64	23.2781	23.1613	23.3948
1956.56	23.0821	22.9814	23.1828
1956.47	22.8814	22.793	22.9699
1956.39	22.6426	22.5607	22.7245
1956.31	22.5542	22.472	22.6364
1956.22	22.6301	22.5482	22.7119
1956.14	22.6059	22.5241	22.6877
1956.06	22.7283	22.6452	22.8114
1955.97	22.9498	22.8578	23.0419
1955.89	23.1845	23.0758	23.2932
1955.81	23.4998	23.3618	23.6378
1955.72	23.8434	23.6689	24.018
1955.64	23.9352	23.7504	24.12
1955.56	23.8975	23.7169	24.078
1955.47	23.7662	23.6001	23.9323
1955.39	23.598	23.4499	23.7461
1955.31	23.4001	23.272	23.5282
1955.22	23.2325	23.1198	23.3453
1955.14	23.074	22.9739	23.1741
1955.06	22.9492	22.8572	23.0412
1954.97	22.8741	22.786	22.9622
1954.89	22.8787	22.7904	22.967
1954.81	22.9489	22.8569	23.0409
1954.72	22.9791	22.8854	23.0729
1954.64	22.9886	22.8943	23.083
1954.56	22.9701	22.8768	23.0633
1954.47	22.8964	22.8073	22.9856
1954.39	22.8355	22.7491	22.922
1954.31	22.8129	22.7274	22.8985
1954.22	22.8202	22.7344	22.906
1954.14	22.8173	22.7316	22.903
1954.06	22.8546	22.7674	22.9418
1953.97	22.8603	22.7728	22.9478
1953.89	22.9221	22.8316	23.0126
1953.81	23.0442	22.9462	23.1422
1953.72	23.1641	23.0571	23.2712
1953.64	23.2553	23.1405	23.37
1953.56	23.2814	23.1644	23.3985
1953.47	23.2262	23.114	23.3384
1953.39	23.1005	22.9984	23.2025
1953.31	22.9795	22.8858	23.0733
1953.22	22.8656	22.7779	22.9533
1953.14	22.8087	22.7233	22.894
1953.06	22.8033	22.7181	22.8885
1952.97	22.8562	22.769	22.9435
1952.89	22.9577	22.8652	23.0502
1952.81	23.0794	22.9789	23.1799
1952.72	23.1877	23.0788	23.2967
1952.64	23.2685	23.1526	23.3844
1952.56	23.2764	23.1598	23.393
1952.47	23.2073	23.0967	23.3179
1952.39	23.1432	23.0378	23.2485
1952.31	23.0616	22.9624	23.1608
1952.22	22.8885	22.7997	22.9772
1952.14	22.7332	22.65	22.8164
1952.06	22.665	22.5829	22.7471
1951.97	22.6653	22.5833	22.7474
1951.89	22.7266	22.6435	22.8096
1951.81	22.9088	22.819	22.9986
1951.72	23.0975	22.9956	23.1993
1951.64	23.2247	23.1126	23.3368
1951.56	23.2777	23.1609	23.3944
1951.47	23.2997	23.181	23.4184
1951.39	23.2736	23.1572	23.39
1951.31	23.1902	23.081	23.2994
1951.22	23.1147	23.0115	23.2178
1951.14	23.0732	22.9731	23.1733
1951.06	23.1024	23.0002	23.2046
1950.97	23.2083	23.0977	23.319
1950.89	23.4165	23.2868	23.5462
1950.81	23.6404	23.4879	23.793
1950.72	23.8282	23.6553	24.0011
1950.64	23.9368	23.7518	24.1218
1950.56	23.9773	23.7877	24.1668
1950.47	23.9625	23.7746	24.1504
1950.39	23.9319	23.7474	24.1163
1950.31	23.9019	23.7208	24.083
1950.22	23.8738	23.6958	24.0517
1950.14	23.8526	23.677	24.0282
1950.06	23.8508	23.6754	24.0261
1949.97	23.8785	23.7	24.057
1949.89	23.9251	23.7414	24.1088
1949.81	23.9839	23.7936	24.1743
1949.72	24.034	23.838	24.23
1949.64	24.0638	23.8643	24.2632
1949.56	24.0709	23.8706	24.2711
1949.47	24.0468	23.8493	24.2442
1949.39	24.0067	23.8138	24.1996
1949.31	23.9709	23.782	24.1597
1949.22	23.8729	23.695	24.0507
1949.14	23.7427	23.5791	23.9062
1949.06	23.6998	23.541	23.8587
1948.97	23.6786	23.522	23.8352
1948.89	23.6831	23.526	23.8402
1948.81	23.762	23.5964	23.9276
1948.72	23.8171	23.6455	23.9888
1948.64	23.755	23.5901	23.9199
1948.56	23.6674	23.512	23.8228
1948.47	23.4907	23.3536	23.6277
1948.39	23.2829	23.1657	23.4001
1948.31	23.1558	23.0494	23.2622
1948.22	23.057	22.9581	23.1559
1948.14	22.9387	22.8473	23.0301
1948.06	22.9228	22.8323	23.0134
1947.97	22.9973	22.9024	23.0922
1947.89	23.1563	23.0499	23.2627
1947.81	23.3898	23.2627	23.517
1947.72	23.6233	23.4725	23.774
1947.64	23.7825	23.6147	23.9504
1947.56	23.7705	23.604	23.9371
1947.47	23.6482	23.4948	23.8016
1947.39	23.3498	23.2264	23.4731
1947.31	23.034	22.9367	23.1313
1947.22	22.7349	22.6517	22.8181
1947.14	22.53	22.4475	22.6125
1947.06	22.3289	22.2396	22.4182
1946.97	22.2763	22.1841	22.3685
1946.89	22.1984	22.1013	22.2954
1946.81	22.2265	22.1313	22.3217
1946.72	22.2466	22.1527	22.3406
1946.64	22.2657	22.1729	22.3584
1946.56	22.2441	22.15	22.3381
1946.47	22.2993	22.2084	22.3902
1946.39	22.273	22.1806	22.3653
1946.31	22.2847	22.1931	22.3764
1946.22	22.284	22.1923	22.3757
1946.14	22.2958	22.2048	22.3869
1946.06	22.2941	22.203	22.3853
1945.97	22.2991	22.2083	22.39
1945.89	22.3013	22.2105	22.392
1945.81	22.3278	22.2385	22.4172
1945.72	22.3154	22.2254	22.4054
1945.64	22.3288	22.2395	22.4181
1945.56	22.3123	22.2221	22.4024
1945.47	22.2829	22.1911	22.3747
1945.39	22.2614	22.1683	22.3544
1945.31	22.27	22.1775	22.3625
1945.22	22.2538	22.1603	22.3473
1945.14	22.2622	22.1692	22.3551
1945.06	22.2632	22.1703	22.3561
1944.97	22.2682	22.1756	22.3608
1944.89	22.3396	22.2509	22.4284
1944.81	22.4541	22.3698	22.5383
1944.72	22.5454	22.4631	22.6277
1944.64	22.6584	22.5764	22.7405
1944.56	22.7412	22.6579	22.8246
1944.47	22.7535	22.6699	22.8372
1944.39	22.7249	22.6419	22.8079
1944.31	22.7275	22.6444	22.8105
1944.22	22.6925	22.6101	22.7749
1944.14	22.6804	22.5981	22.7626
1944.06	22.681	22.5988	22.7633
1943.97	22.6959	22.6134	22.7783
1943.89	22.682	22.5997	22.7642
1943.81	22.7068	22.6242	22.7895
1943.72	22.6713	22.5892	22.7535
1943.64	22.622	22.5402	22.7039
1943.56	22.5363	22.4539	22.6187
1943.47	22.459	22.3749	22.5431
1943.39	22.388	22.3014	22.4746
1943.31	22.3316	22.2424	22.4208
1943.22	22.275	22.1828	22.3672
1943.14	22.2396	22.1453	22.334
1943.06	22.3084	22.218	22.3988
1942.97	22.356	22.268	22.444
1942.89	22.5015	22.4185	22.5846
1942.81	22.7224	22.6394	22.8053
1942.72	22.9661	22.8731	23.059
1942.64	23.1109	23.0081	23.2138
1942.56	23.2038	23.0935	23.3141
1942.47	23.2114	23.1005	23.3223
1942.39	23.153	23.0469	23.2592
1942.31	23.0854	22.9844	23.1863
1942.22	22.9713	22.878	23.0646
1942.14	22.907	22.8173	22.9967
1942.06	22.9243	22.8337	23.0149
1941.97	23.0056	22.9101	23.101
1941.89	23.1624	23.0556	23.2693
1941.81	23.4069	23.2781	23.5357
1941.72	23.6413	23.4887	23.794
1941.64	23.8166	23.645	23.9882
1941.56	23.9004	23.7195	24.0814
1941.47	23.9306	23.7463	24.1149
1941.39	23.9006	23.7197	24.0815
1941.31	23.8207	23.6486	23.9927
1941.22	23.6213	23.4708	23.7718
1941.14	23.4163	23.2866	23.546
1941.06	23.3316	23.21	23.4533
1940.97	23.3005	23.1818	23.4193
1940.89	23.3349	23.213	23.4569
1940.81	23.4959	23.3583	23.6335
1940.72	23.6875	23.5299	23.845
1940.64	23.7076	23.5479	23.8673
1940.56	23.6678	23.5124	23.8233
1940.47	23.5633	23.4189	23.7078
1940.39	23.2644	23.1489	23.38
1940.31	22.9651	22.8722	23.0581
1940.22	22.6674	22.5853	22.7495
1940.14	22.3302	22.2409	22.4194
1940.06	22.2552	22.1618	22.3486
1939.97	22.464	22.38	22.5479
1939.89	22.7456	22.6622	22.8291
1939.81	23.0794	22.9789	23.1799
1939.72	23.4856	23.3491	23.6222
1939.64	23.6462	23.4931	23.7994
1939.56	23.6867	23.5293	23.8442
1939.47	23.6296	23.4782	23.7809
1939.39	23.4427	23.3104	23.575
1939.31	23.2638	23.1483	23.3793
1939.22	23.1103	23.0075	23.2131
1939.14	22.973	22.8796	23.0664
1939.06	22.8572	22.7699	22.9445
1938.97	22.9132	22.8232	23.0032
1938.89	22.9954	22.9006	23.0902
1938.81	23.1521	23.0461	23.2582
1938.72	23.2923	23.1743	23.4103
1938.64	23.4464	23.3137	23.579
1938.56	23.4889	23.352	23.6257
1938.47	23.4708	23.3357	23.6058
1938.39	23.4001	23.272	23.5282
1938.31	23.3236	23.2027	23.4444
1938.22	23.2384	23.1251	23.3517
1938.14	23.2104	23.0996	23.3213
1938.06	23.2912	23.1732	23.4091
1937.97	23.3954	23.2677	23.5231
1937.89	23.5262	23.3855	23.6668
1937.81	23.6692	23.5136	23.8248
1937.72	23.7773	23.61	23.9445
1937.64	23.8098	23.6389	23.9806
1937.56	23.7877	23.6193	23.9562
1937.47	23.7675	23.6013	23.9337
1937.39	23.7562	23.5912	23.9212
1937.31	23.7754	23.6083	23.9425
1937.22	23.5194	23.3795	23.6594
1937.14	23.2748	23.1583	23.3912
1937.06	23.1891	23.08	23.2982
1936.97	23.1364	23.0316	23.2412
1936.89	23.1304	23.0261	23.2348
1936.81	23.4181	23.2882	23.548
1936.72	23.7029	23.5437	23.8621
1936.64	23.7974	23.6279	23.9669
1936.56	23.825	23.6524	23.9975
1936.47	23.8063	23.6359	23.9768
1936.39	23.7346	23.5719	23.8972
1936.31	23.6871	23.5296	23.8446
1936.22	23.6505	23.4969	23.8041
1936.14	23.624	23.4732	23.7748
1936.06	23.5903	23.4431	23.7376
1935.97	23.5975	23.4495	23.7455
1935.89	23.6042	23.4555	23.7529
1935.81	23.6369	23.4847	23.7891
1935.72	23.6641	23.5091	23.8192
1935.64	23.6585	23.5041	23.813
1935.56	23.6137	23.464	23.7635
1935.47	23.5538	23.4103	23.6973
1935.39	23.4377	23.3059	23.5695
1935.31	23.338	23.2158	23.4602
1935.22	23.2513	23.1369	23.3657
1935.14	23.2158	23.1045	23.3272
1935.06	23.1909	23.0817	23.3001
1934.97	23.2383	23.1251	23.3516
1934.89	23.2907	23.1728	23.4086
1934.81	23.3585	23.2344	23.4827
1934.72	23.3752	23.2495	23.5009
1934.64	23.3605	23.2361	23.4848
1934.56	23.3197	23.1992	23.4403
1934.47	23.2661	23.1504	23.3817
1934.39	23.1981	23.0882	23.3079
1934.31	23.1469	23.0413	23.2526
1934.22	23.1206	23.017	23.2241
1934.14	23.0727	22.9727	23.1727
1934.06	23.0544	22.9557	23.1531
1933.97	23.0382	22.9406	23.1358
1933.89	23.0934	22.9919	23.195
1933.81	23.1482	23.0425	23.254
1933.72	23.2318	23.1191	23.3444
1933.64	23.2546	23.14	23.3693
1933.56	23.2624	23.1471	23.3778
1933.47	23.1966	23.0869	23.3064
1933.39	23.0833	22.9825	23.1841
1933.31	22.9117	22.8217	23.0016
1933.22	22.7454	22.6619	22.8288
1933.14	22.5751	22.4931	22.6571
1933.06	22.4886	22.4053	22.5719
1932.97	22.482	22.3985	22.5655
1932.89	22.5769	22.495	22.6589
1932.81	22.8026	22.7174	22.8878
1932.72	23.0642	22.9648	23.1636
1932.64	23.2239	23.1119	23.336
1932.56	23.2936	23.1754	23.4117
1932.47	23.2897	23.1719	23.4075
1932.39	23.1687	23.0613	23.2761
1932.31	23.0166	22.9204	23.1127
1932.22	22.8489	22.7619	22.9358
1932.14	22.7234	22.6405	22.8064
1932.06	22.6427	22.5608	22.7246
1931.97	22.6517	22.5697	22.7337
1931.89	22.7106	22.6279	22.7933
1931.81	22.8153	22.7296	22.9009
1931.72	22.9005	22.8111	22.9898
1931.64	22.9166	22.8264	23.0068
1931.56	22.8313	22.745	22.9175
1931.47	22.6659	22.5838	22.7479
1931.39	22.5412	22.4589	22.6235
1931.31	22.4737	22.39	22.5574
1931.22	22.4311	22.3461	22.5161
1931.14	22.3927	22.3062	22.4791
1931.06	22.4232	22.3379	22.5084
1930.97	22.398	22.3118	22.4842
1930.89	22.405	22.3191	22.4909
1930.81	22.4542	22.3699	22.5384
1930.72	22.5208	22.4382	22.6035
1930.64	22.5361	22.4537	22.6185
1930.56	22.5081	22.4252	22.591
1930.47	22.4251	22.3399	22.5103
1930.39	22.3011	22.2104	22.3919
1930.31	22.1815	22.0833	22.2797
1930.22	22.0857	21.9804	22.191
1930.14	22.0726	21.9662	22.1789
1930.06	22.1396	22.0384	22.2408
1929.97	22.2297	22.1348	22.3247
1929.89	22.363	22.2753	22.4507
1929.81	22.5415	22.4592	22.6239
1929.72	22.6833	22.601	22.7656
1929.64	22.7539	22.6702	22.8376
1929.56	22.8251	22.7391	22.9111
1929.47	22.85	22.7629	22.937
1929.39	22.8224	22.7365	22.9083
1929.31	22.7921	22.7073	22.8769
1929.22	22.7803	22.6958	22.8647
1929.14	22.6941	22.6117	22.7766
1929.06	22.6533	22.5713	22.7353
1928.97	22.6933	22.6109	22.7758
1928.89	22.8297	22.7435	22.9159
1928.81	22.9921	22.8975	23.0866
1928.72	23.2251	23.113	23.3372
1928.64	23.4012	23.273	23.5295
1928.56	23.5438	23.4013	23.6862
1928.47	23.5449	23.4023	23.6874
1928.39	23.4633	23.329	23.5977
1928.31	23.3494	23.2261	23.4727
1928.22	23.1865	23.0776	23.2953
1928.14	22.9864	22.8922	23.0806
1928.06	22.8591	22.7717	22.9465
1927.97	22.7592	22.6754	22.8431
1927.89	22.7154	22.6326	22.7982
1927.81	22.7584	22.6746	22.8422
1927.72	22.8038	22.7186	22.889
1927.64	22.8124	22.7268	22.8979
1927.56	22.8207	22.7348	22.9065
1927.47	22.7467	22.6632	22.8302
1927.39	22.678	22.5957	22.7602
1927.31	22.5724	22.4904	22.6544
1927.22	22.4854	22.402	22.5688
1927.14	22.4337	22.3488	22.5186
1927.06	22.4088	22.323	22.4946
1926.97	22.4272	22.3421	22.5123
1926.89	22.4951	22.4119	22.5783
1926.81	22.5782	22.4962	22.6601
1926.72	22.6139	22.5321	22.6957
1926.64	22.6756	22.5934	22.7577
1926.56	22.6724	22.5903	22.7546
1926.47	22.6501	22.5681	22.732
1926.39	22.5996	22.5178	22.6815
1926.31	22.5632	22.4811	22.6453
1926.22	22.5178	22.4351	22.6005
1926.14	22.4565	22.3723	22.5407
1926.06	22.4412	22.3566	22.5259
1925.97	22.4727	22.3889	22.5564
1925.89	22.5357	22.4532	22.6181
1925.81	22.6429	22.561	22.7249
1925.72	22.7608	22.677	22.8447
1925.64	22.8439	22.7572	22.9307
1925.56	22.8889	22.8001	22.9777
1925.47	22.9024	22.8129	22.9918
1925.39	22.8785	22.7902	22.9668
1925.31	22.8481	22.7612	22.935
1925.22	22.8128	22.7273	22.8984
1925.14	22.7785	22.6941	22.8629
1925.06	22.7564	22.6726	22.8402
1924.97	22.7501	22.6665	22.8337
1924.89	22.7848	22.7003	22.8694
1924.81	22.8501	22.763	22.9371
1924.72	22.9094	22.8195	22.9992
1924.64	22.9626	22.8698	23.0553
1924.56	22.9898	22.8953	23.0842
1924.47	22.967	22.874	23.0601
1924.39	22.9368	22.8455	23.0281
1924.31	22.8977	22.8084	22.9869
1924.22	22.7763	22.692	22.8606
1924.14	22.6473	22.5654	22.7292
1924.06	22.5902	22.5083	22.6721
1923.97	22.5441	22.4618	22.6264
1923.89	22.4098	22.3241	22.4956
1923.81	22.481	22.3975	22.5645
1923.72	22.5742	22.4922	22.6562
1923.64	22.616	22.5342	22.6978
1923.56	22.6208	22.539	22.7026
1923.47	22.7314	22.6482	22.8145
1923.39	22.713	22.6303	22.7958
1923.31	22.689	22.6066	22.7714
1923.22	22.6459	22.564	22.7278
1923.14	22.5736	22.4916	22.6555
1923.06	22.5745	22.4925	22.6565
1922.97	22.6046	22.5227	22.6864
1922.89	22.6145	22.5327	22.6963
1922.81	22.6989	22.6164	22.7815
1922.72	22.8131	22.7276	22.8987
1922.64	22.8414	22.7547	22.928
1922.56	22.834	22.7476	22.9203
1922.47	22.8416	22.7549	22.9282
1922.39	22.777	22.6926	22.8613
1922.31	22.7084	22.6257	22.791
1922.22	22.6236	22.5418	22.7055
1922.14	22.5362	22.4538	22.6187
1922.06	22.5175	22.4348	22.6003
1921.97	22.5594	22.4773	22.6415
1921.89	22.6106	22.5288	22.6925
1921.81	22.7629	22.679	22.8468
1921.72	22.9104	22.8206	23.0003
1921.64	22.9316	22.8406	23.0226
1921.56	22.8196	22.7338	22.9054
1921.47	22.638	22.5561	22.7199
1921.39	22.3079	22.2175	22.3983
1921.31	21.9077	21.7871	22.0283
1921.22	21.4935	21.3308	21.6561
1921.14	21.1959	21.0001	21.3917
1921.06	21.2372	21.0461	21.4284
1920.97	21.5509	21.3944	21.7074
1920.89	22.0374	21.9281	22.1466
1920.81	22.6621	22.58	22.7441
1920.72	23.227	23.1147	23.3393
1920.64	23.5272	23.3865	23.668
1920.56	23.6332	23.4814	23.785
1920.47	23.5936	23.446	23.7413
1920.39	23.4801	23.3441	23.616
1920.31	23.3606	23.2362	23.4849
1920.22	23.1804	23.072	23.2888
1920.14	22.9931	22.8985	23.0878
1920.06	22.8888	22.8	22.9775
1919.97	22.8111	22.7256	22.8966
1919.89	22.8013	22.7162	22.8864
1919.81	22.8688	22.781	22.9566
1919.72	22.9439	22.8523	23.0356
1919.64	22.9967	22.9018	23.0915
1919.56	23.0355	22.9381	23.1329
1919.47	23.0245	22.9278	23.1211
1919.39	22.9785	22.8848	23.0722
1919.31	22.9209	22.8305	23.0113
1919.22	22.8102	22.7247	22.8956
1919.14	22.6856	22.6033	22.7679
1919.06	22.5875	22.5056	22.6694
1918.97	22.5394	22.457	22.6218
1918.89	22.5173	22.4345	22.6
1918.81	22.6466	22.5646	22.7285
1918.72	22.7736	22.6894	22.8578
1918.64	22.9022	22.8128	22.9917
1918.56	22.9845	22.8904	23.0786
1918.47	23.0363	22.9388	23.1337
1918.39	22.939	22.8476	23.0304
1918.31	22.8358	22.7494	22.9222
1918.22	22.6967	22.6143	22.7792
1918.14	22.5849	22.503	22.6668
1918.06	22.5405	22.4582	22.6229
1917.97	22.5408	22.4584	22.6231
1917.89	22.6056	22.5238	22.6874
1917.81	22.7557	22.672	22.8395
1917.72	22.8335	22.7471	22.9198
1917.64	22.8282	22.7421	22.9143
1917.56	22.8497	22.7627	22.9367
1917.47	22.8055	22.7202	22.8908
1917.39	22.6839	22.6016	22.7662
1917.31	22.6265	22.5446	22.7083
1917.22	22.6221	22.5403	22.704
1917.14	22.5873	22.5054	22.6692
1917.06	22.5974	22.5155	22.6792
1916.97	22.6293	22.5475	22.7112
1916.89	22.6551	22.5731	22.7371
1916.81	22.7221	22.6391	22.805
1916.72	22.7553	22.6716	22.839
1916.64	22.7699	22.6858	22.854
1916.56	22.8034	22.7182	22.8886
1916.47	22.8043	22.719	22.8895
1916.39	22.7401	22.6568	22.8234
1916.31	22.7102	22.6275	22.7929
1916.22	22.706	22.6233	22.7886
1916.14	22.645	22.5631	22.727
1916.06	22.6464	22.5645	22.7283
1915.97	22.6911	22.6087	22.7735
1915.89	22.7586	22.6748	22.8424
1915.81	22.8613	22.7738	22.9488
1915.72	22.9074	22.8177	22.9971
1915.64	22.9152	22.8251	23.0053
1915.56	22.8919	22.8029	22.9808
1915.47	22.8423	22.7556	22.9289
1915.39	22.7224	22.6395	22.8054
1915.31	22.6898	22.6075	22.7722
1915.22	22.6666	22.5845	22.7487
1915.14	22.656	22.574	22.738
1915.06	22.6605	22.5785	22.7426
1914.97	22.6916	22.6092	22.774
1914.89	22.7684	22.6844	22.8525
1914.81	22.869	22.7812	22.9569
1914.72	22.937	22.8457	23.0283
1914.64	22.9214	22.831	23.0119
1914.56	22.8886	22.7999	22.9774
1914.47	22.8176	22.7319	22.9033
1914.39	22.7201	22.6372	22.803
1914.31	22.5651	22.4831	22.6472
1914.22	22.4703	22.3865	22.5541
1914.14	22.3747	22.2875	22.4619
1914.06	22.3549	22.2669	22.443
1913.97	22.2477	22.1539	22.3416
1913.89	22.2573	22.1641	22.3506
1913.81	22.3339	22.2449	22.423
1913.72	22.3885	22.3019	22.4751
1913.64	22.3649	22.2773	22.4525
1913.56	22.3217	22.2321	22.4114
1913.47	22.2415	22.1473	22.3358
1913.39	22.111	22.0077	22.2144
1913.31	22.0096	21.898	22.1211
1913.22	21.9096	21.7891	22.03
1913.14	21.9283	21.8096	22.0471
1913.06	21.941	21.8234	22.0586
1912.97	21.9448	21.8275	22.062
1912.89	21.9793	21.8651	22.0935
1912.81	22.0744	21.9682	22.1806
1912.72	22.1575	22.0576	22.2573
1912.64	22.2487	22.1549	22.3425
1912.56	22.369	22.2816	22.4565
1912.47	22.4513	22.3669	22.5356
1912.39	22.4798	22.3962	22.5633
1912.31	22.5512	22.469	22.6334
1912.22	22.5987	22.5169	22.6806
1912.14	22.6061	22.5243	22.688
1912.06	22.6424	22.5604	22.7243
1911.97	22.7028	22.6202	22.7853
1911.89	22.7608	22.6769	22.8447
1911.81	22.8364	22.75	22.9229
1911.72	22.905	22.8154	22.9946
1911.64	22.9647	22.8718	23.0576
1911.56	22.9875	22.8932	23.0818
1911.47	22.9651	22.8722	23.058
1911.39	22.9275	22.8367	23.0183
1911.31	22.9146	22.8245	23.0047
1911.22	22.8744	22.7863	22.9625
1911.14	22.8069	22.7216	22.8923
1911.06	22.8003	22.7152	22.8854
1910.97	22.8026	22.7174	22.8878
1910.89	22.8447	22.7579	22.9315
1910.81	22.9137	22.8237	23.0038
1910.72	23.0027	22.9074	23.0979
1910.64	23.0114	22.9156	23.1072
1910.56	22.9841	22.89	23.0781
1910.47	22.8943	22.8053	22.9834
1910.39	22.7356	22.6524	22.8189
1910.31	22.5217	22.4391	22.6044
1910.22	22.2895	22.1981	22.3809
1910.14	22.0936	21.9889	22.1983
1910.06	21.9733	21.8586	22.088
1909.97	22.0262	21.9161	22.1364
1909.89	22.2571	22.1638	22.3504
1909.81	22.6024	22.5206	22.6842
1909.72	22.9295	22.8386	23.0204
1909.64	23.2016	23.0915	23.3117
1909.56	23.331	23.2094	23.4525
1909.47	23.3487	23.2254	23.4719
1909.39	23.2398	23.1264	23.3532
1909.31	23.108	23.0054	23.2107
1909.22	22.9208	22.8304	23.0112
1909.14	22.7324	22.6493	22.8156
1909.06	22.6034	22.5216	22.6853
1908.97	22.5814	22.4994	22.6633
1908.89	22.7048	22.6222	22.7874
1908.81	22.9094	22.8196	22.9992
1908.72	23.1346	23.0299	23.2393
1908.64	23.2729	23.1566	23.3892
1908.56	23.3064	23.1871	23.4257
1908.47	23.1978	23.088	23.3076
1908.39	23.0546	22.9558	23.1533
1908.31	22.8942	22.8051	22.9832
1908.22	22.6997	22.6171	22.7822
1908.14	22.5136	22.4308	22.5964
1908.06	22.4357	22.3509	22.5205
1907.97	22.372	22.2847	22.4593
1907.89	22.4308	22.3458	22.5158
1907.81	22.5844	22.5025	22.6664
1907.72	22.7663	22.6823	22.8503
1907.64	22.831	22.7448	22.9173
1907.56	22.8975	22.8083	22.9867
1907.47	22.8727	22.7846	22.9607
1907.39	22.8096	22.7242	22.895
1907.31	22.7608	22.6769	22.8447
1907.22	22.7486	22.6651	22.8322
1907.14	22.6694	22.5873	22.7515
1907.06	22.6562	22.5742	22.7382
1906.97	22.7314	22.6482	22.8145
1906.89	22.9217	22.8312	23.0122
1906.81	23.1336	23.029	23.2382
1906.72	23.3945	23.2669	23.5221
1906.64	23.5917	23.4442	23.7391
1906.56	23.7084	23.5486	23.8682
1906.47	23.6946	23.5362	23.8529
1906.39	23.6411	23.4885	23.7937
1906.31	23.5665	23.4217	23.7114
1906.22	23.427	23.2962	23.5577
1906.14	23.2745	23.1581	23.391
1906.06	23.1572	23.0507	23.2637
1905.97	23.1055	23.003	23.2079
1905.89	23.1797	23.0714	23.288
1905.81	23.3271	23.2058	23.4483
1905.72	23.3769	23.251	23.5028
1905.64	23.3625	23.238	23.4871
1905.56	23.3448	23.2219	23.4676
1905.47	23.1903	23.0811	23.2995
1905.39	22.9785	22.8848	23.0722
1905.31	22.8297	22.7435	22.9158
1905.22	22.7385	22.6552	22.8218
1905.14	22.5963	22.5144	22.6781
1905.06	22.5233	22.4406	22.6059
1904.97	22.504	22.421	22.587
1904.89	22.5189	22.4362	22.6016
1904.81	22.5656	22.4836	22.6477
1904.72	22.6278	22.5459	22.7096
1904.64	22.6656	22.5835	22.7477
1904.56	22.6676	22.5855	22.7497
1904.47	22.6782	22.596	22.7605
1904.39	22.6386	22.5567	22.7205
1904.31	22.5986	22.5167	22.6804
1904.22	22.5668	22.4848	22.6488
1904.14	22.5309	22.4484	22.6134
1904.06	22.5488	22.4666	22.6311
1903.97	22.6053	22.5234	22.6871
1903.89	22.6892	22.6068	22.7716
1903.81	22.8228	22.7369	22.9087
1903.72	22.9324	22.8414	23.0235
1903.64	22.9542	22.8619	23.0465
1903.56	22.9614	22.8687	23.0541
1903.47	22.9332	22.8421	23.0243
1903.39	22.8396	22.753	22.9261
1903.31	22.7946	22.7097	22.8795
1903.22	22.7738	22.6895	22.858
1903.14	22.7459	22.6624	22.8294
1903.06	22.771	22.6869	22.8552
1902.97	22.9071	22.8174	22.9968
1902.89	23.0588	22.9597	23.1578
1902.81	23.2656	23.15	23.3812
1902.72	23.4613	23.3271	23.5954
1902.64	23.5997	23.4515	23.748
1902.56	23.6324	23.4807	23.784
1902.47	23.624	23.4732	23.7748
1902.39	23.5433	23.4009	23.6857
1902.31	23.4045	23.276	23.5331
1902.22	23.1931	23.0837	23.3025
1902.14	22.9679	22.8748	23.061
1902.06	22.9801	22.8863	23.0739
1901.97	23.0091	22.9135	23.1048
1901.89	23.1411	23.0359	23.2463
1901.81	23.3521	23.2286	23.4757
1901.72	23.5897	23.4424	23.7369
1901.64	23.5583	23.4143	23.7023
1901.56	23.4979	23.3601	23.6357
1901.47	23.3737	23.2481	23.4993
1901.39	23.2444	23.1306	23.3582
1901.31	23.0349	22.9376	23.1323
1901.22	22.8716	22.7836	22.9596
1901.14	22.7415	22.6581	22.8248
1901.06	22.7247	22.6417	22.8077
1900.97	22.8649	22.7772	22.9526
1900.89	23.0679	22.9682	23.1676
1900.81	23.318	23.1976	23.4383
1900.72	23.5503	23.4072	23.6934
1900.64	23.6544	23.5004	23.8085
1900.56	23.5903	23.443	23.7375
1900.47	23.5266	23.3859	23.6673
1900.39	23.4025	23.2741	23.5308
1900.31	23.2587	23.1437	23.3737
1900.22	23.0826	22.9819	23.1834
1900.14	22.895	22.8059	22.9841
1900.06	22.8454	22.7586	22.9322
1899.97	22.8249	22.7389	22.9109
1899.89	22.9421	22.8505	23.0337
1899.81	23.222	23.1102	23.3339
1899.72	23.5276	23.3868	23.6684
1899.64	23.712	23.5518	23.8722
1899.56	23.8741	23.6962	24.0521
1899.47	23.9455	23.7595	24.1315
1899.39	23.8892	23.7095	24.0689
1899.31	23.8571	23.681	24.0332
1899.22	23.7711	23.6045	23.9377
1899.14	23.7106	23.5506	23.8706
1899.06	23.6996	23.5408	23.8585
1898.97	23.7312	23.5689	23.8935
1898.89	23.7241	23.5626	23.8856
1898.81	23.8047	23.6344	23.975
1898.72	23.8419	23.6675	24.0163
1898.64	23.753	23.5883	23.9176
1898.56	23.6249	23.474	23.7758
1898.47	23.4933	23.356	23.6306
1898.39	23.2991	23.1804	23.4177
1898.31	22.9981	22.9032	23.0931
1898.22	22.6862	22.6038	22.7685
1898.14	22.4315	22.3465	22.5165
1898.06	22.2975	22.2066	22.3885
1897.97	22.2521	22.1586	22.3457
1897.89	22.3333	22.2442	22.4224
1897.81	22.6248	22.543	22.7066
1897.72	22.905	22.8154	22.9946
1897.64	23.0714	22.9715	23.1714
1897.56	23.2069	23.0963	23.3175
1897.47	23.3239	23.203	23.4448
1897.39	23.3389	23.2166	23.4612
1897.31	23.3095	23.1899	23.4291
1897.22	23.3081	23.1887	23.4276
1897.14	23.2892	23.1714	23.4069
1897.06	23.3142	23.1942	23.4342
1896.97	23.3728	23.2473	23.4984
1896.89	23.5068	23.3681	23.6455
1896.81	23.6384	23.4861	23.7907
1896.72	23.7436	23.58	23.9072
1896.64	23.8592	23.6829	24.0356
1896.56	23.8867	23.7073	24.0661
1896.47	23.8553	23.6794	24.0311
1896.39	23.7406	23.5773	23.9039
1896.31	23.6437	23.4908	23.7965
1896.22	23.5579	23.414	23.7018
1896.14	23.4816	23.3455	23.6178
1896.06	23.4218	23.2916	23.5521
1895.97	23.4332	23.3019	23.5646
1895.89	23.4489	23.316	23.5818
1895.81	23.4532	23.3199	23.5865
1895.72	23.4728	23.3375	23.6081
1895.64	23.5017	23.3635	23.6399
1895.56	23.4949	23.3574	23.6324
1895.47	23.4546	23.3211	23.588
1895.39	23.3917	23.2644	23.519
1895.31	23.2806	23.1636	23.3976
1895.22	23.1028	23.0005	23.205
1895.14	22.952	22.8598	23.0441
1895.06	22.8703	22.7823	22.9582
1894.97	22.8454	22.7586	22.9322
1894.89	22.877	22.7888	22.9652
1894.81	22.9982	22.9032	23.0932
1894.72	23.0915	22.9901	23.1929
1894.64	23.1343	23.0297	23.239
1894.56	23.1361	23.0313	23.2409
1894.47	23.1267	23.0226	23.2307
1894.39	23.0734	22.9733	23.1735
1894.31	23.0619	22.9626	23.1611
1894.22	23.0283	22.9314	23.1252
1894.14	22.9827	22.8887	23.0767
1894.06	22.9493	22.8573	23.0413
1893.97	22.9754	22.8819	23.069
1893.89	23.0032	22.9079	23.0985
1893.81	23.1194	23.0159	23.2229
1893.72	23.1996	23.0897	23.3096
1893.64	23.2942	23.176	23.4124
1893.56	23.3519	23.2283	23.4754
1893.47	23.3983	23.2704	23.5263
1893.39	23.3718	23.2464	23.4972
1893.31	23.3828	23.2564	23.5093
1893.22	23.3453	23.2224	23.4683
1893.14	23.2688	23.1528	23.3847
1893.06	23.2247	23.1126	23.3368
1892.97	23.226	23.1138	23.3382
1892.89	23.2378	23.1246	23.351
1892.81	23.2993	23.1807	23.418
1892.72	23.3803	23.2541	23.5065
1892.64	23.438	23.3062	23.5698
1892.56	23.4601	23.3261	23.5941
1892.47	23.4606	23.3266	23.5947
1892.39	23.4356	23.304	23.5672
1892.31	23.3844	23.2578	23.511
1892.22	23.2924	23.1743	23.4104
1892.14	23.1996	23.0896	23.3095
1892.06	23.1223	23.0186	23.2261
1891.97	23.0758	22.9756	23.1761
1891.89	23.065	22.9655	23.1645
1891.81	23.1109	23.0081	23.2138
1891.72	23.159	23.0524	23.2656
1891.64	23.1992	23.0893	23.3092
1891.56	23.2039	23.0936	23.3142
1891.47	23.2001	23.0901	23.3101
1891.39	23.1528	23.0467	23.2589
1891.31	23.0951	22.9935	23.1968
1891.22	23.007	22.9115	23.1025
1891.14	22.934	22.8429	23.0252
1891.06	22.9422	22.8506	23.0338
1890.97	23.0051	22.9097	23.1005
1890.89	23.1128	23.0098	23.2158
1890.81	23.2378	23.1246	23.351
1890.72	23.3765	23.2507	23.5024
1890.64	23.4093	23.2803	23.5383
1890.56	23.4292	23.2983	23.5602
1890.47	23.4081	23.2792	23.537
1890.39	23.3692	23.2441	23.4944
1890.31	23.3061	23.1868	23.4254
1890.22	23.2802	23.1633	23.3972
1890.14	23.174	23.0662	23.2819
1890.06	23.1619	23.055	23.2687
1889.97	23.2097	23.0989	23.3205
1889.89	23.327	23.2058	23.4483
1889.81	23.4559	23.3223	23.5895
1889.72	23.6523	23.4985	23.8061
1889.64	23.7376	23.5747	23.9006
1889.56	23.7601	23.5947	23.9255
1889.47	23.6639	23.5089	23.819
1889.39	23.4994	23.3615	23.6374
1889.31	23.2973	23.1789	23.4158
1889.22	23.0789	22.9784	23.1793
1889.14	22.877	22.7888	22.9652
1889.06	22.7555	22.6718	22.8393
1888.97	22.7889	22.7042	22.8736
1888.89	22.9578	22.8653	23.0503
1888.81	23.212	23.101	23.323
1888.72	23.4662	23.3316	23.6008
1888.64	23.6946	23.5363	23.853
1888.56	23.8419	23.6675	24.0163
1888.47	23.8846	23.7055	24.0638
1888.39	23.8563	23.6803	24.0324
1888.31	23.7833	23.6153	23.9512
1888.22	23.5629	23.4185	23.7073
1888.14	23.2465	23.1326	23.3605
1888.06	22.9847	22.8906	23.0788
1887.97	22.8144	22.7288	22.9
1887.89	22.7554	22.6717	22.8392
1887.81	22.8945	22.8054	22.9836
1887.72	23.1114	23.0085	23.2143
1887.64	23.2136	23.1024	23.3247
1887.56	23.0264	22.9296	23.1232
1887.47	22.8881	22.7993	22.9768
1887.39	22.6972	22.6147	22.7797
1887.31	22.5291	22.4466	22.6116
1887.22	22.1853	22.0874	22.2833
1887.14	22.0591	21.9516	22.1665
1887.06	22.1625	22.063	22.2621
1886.97	22.3645	22.2768	22.4521
1886.89	22.5495	22.4673	22.6318
1886.81	22.9912	22.8966	23.0857
1886.72	23.4178	23.288	23.5477
1886.64	23.4814	23.3453	23.6175
1886.56	23.4451	23.3126	23.5776
1886.47	23.421	23.2909	23.5512
1886.39	23.3955	23.2678	23.5232
1886.31	23.3594	23.2352	23.4837
1886.22	23.2142	23.103	23.3253
1886.14	23.036	22.9385	23.1334
1886.06	22.9206	22.8301	23.011
1885.97	22.8188	22.7331	22.9046
1885.89	22.8402	22.7536	22.9269
1885.81	23.0198	22.9234	23.1162
1885.72	23.2156	23.1043	23.3269
1885.64	23.2912	23.1733	23.4091
1885.56	23.3108	23.1911	23.4306
1885.47	23.2373	23.1241	23.3504
1885.39	23.1212	23.0176	23.2248
1885.31	23.0175	22.9213	23.1137
1885.22	22.9263	22.8356	23.017
1885.14	22.8854	22.7968	22.974
1885.06	22.8793	22.7909	22.9676
1884.97	22.9067	22.817	22.9963
1884.89	22.9613	22.8686	23.054
1884.81	23.062	22.9627	23.1612
1884.72	23.1099	23.0071	23.2127
1884.64	23.0829	22.9821	23.1836
1884.56	23.0059	22.9105	23.1014
1884.47	22.8682	22.7804	22.956
1884.39	22.696	22.6135	22.7784
1884.31	22.5433	22.461	22.6256
1884.22	22.4233	22.3381	22.5086
1884.14	22.3486	22.2603	22.437
1884.06	22.386	22.2993	22.4727
1883.97	22.5192	22.4365	22.6019
1883.89	22.7383	22.655	22.8216
1883.81	22.9963	22.9014	23.0911
1883.72	23.2417	23.1282	23.3553
1883.64	23.3927	23.2653	23.5201
1883.56	23.4232	23.2928	23.5536
1883.47	23.3214	23.2007	23.442
1883.39	23.2004	23.0904	23.3104
1883.31	23.0343	22.937	23.1316
1883.22	22.7811	22.6966	22.8655
1883.14	22.5459	22.4636	22.6281
1883.06	22.523	22.4403	22.6056
1882.97	22.5975	22.5157	22.6794
1882.89	22.7677	22.6837	22.8518
1882.81	23.0771	22.9767	23.1774
1882.72	23.3128	23.1929	23.4327
1882.64	23.3261	23.2049	23.4472
1882.56	23.1675	23.0602	23.2749
1882.47	22.8961	22.8069	22.9852
1882.39	22.611	22.5291	22.6928
1882.31	22.4375	22.3527	22.5223
1882.22	22.2002	22.1033	22.2971
1882.14	22.1153	22.0123	22.2183
1882.06	22.2135	22.1175	22.3095
1881.97	22.3849	22.2982	22.4716
1881.89	22.5447	22.4624	22.627
1881.81	22.8714	22.7834	22.9593
1881.72	23.0692	22.9694	23.1689
1881.64	23.1414	23.0362	23.2467
1881.56	23.1699	23.0624	23.2774
1881.47	23.1293	23.0251	23.2336
1881.39	23.0224	22.9258	23.1189
1881.31	22.8458	22.7589	22.9326
1881.22	22.5564	22.4743	22.6386
1881.14	22.2456	22.1517	22.3396
1881.06	22.0434	21.9346	22.1521
1880.97	21.946	21.8289	22.0632
1880.89	22.0454	21.9368	22.154
1880.81	22.3521	22.2639	22.4402
1880.72	22.5871	22.5052	22.669
1880.64	22.6823	22.6	22.7646
1880.56	22.6227	22.5409	22.7046
1880.47	22.4661	22.3822	22.55
1880.39	22.2474	22.1536	22.3413
1880.31	22.1003	21.9961	22.2044
1880.22	22.0428	21.9341	22.1516
1880.14	22.0401	21.9311	22.1491
1880.06	22.1428	22.0418	22.2437
1879.97	22.4454	22.3609	22.5299
1879.89	22.716	22.6331	22.7988
1879.81	23.0067	22.9112	23.1022
1879.72	23.2634	23.1479	23.3788
1879.64	23.4237	23.2933	23.5541
1879.56	23.3353	23.2133	23.4573
1879.47	23.2466	23.1326	23.3606
1879.39	23.1625	23.0556	23.2694
1879.31	23.1233	23.0195	23.2272
1879.22	22.8149	22.7292	22.9005
1879.14	22.2513	22.1576	22.3449
1879.06	21.8719	21.7479	21.9959
1878.97	21.6437	21.497	21.7904
1878.89	21.5567	21.4009	21.7126
1878.81	21.8331	21.7054	21.9607
1878.72	22.4051	22.3192	22.4911
1878.64	22.7903	22.7055	22.875
1878.56	22.9365	22.8452	23.0277
1878.47	22.9678	22.8747	23.0608
1878.39	22.9094	22.8195	22.9992
1878.31	22.8498	22.7628	22.9369
1878.22	22.7287	22.6456	22.8118
1878.14	22.6405	22.5587	22.7224
1878.06	22.5918	22.5099	22.6737
1877.97	22.5338	22.4513	22.6162
1877.89	22.5159	22.4332	22.5987
1877.81	22.6382	22.5563	22.7201
1877.72	22.7643	22.6803	22.8482
1877.64	22.8044	22.7192	22.8897
1877.56	22.855	22.7677	22.9422
1877.47	22.8598	22.7724	22.9472
1877.39	22.7506	22.667	22.8342
1877.31	22.6085	22.5267	22.6904
1877.22	22.4664	22.3825	22.5503
1877.14	22.4112	22.3255	22.4969
1877.06	22.4202	22.3348	22.5056
1876.97	22.5301	22.4476	22.6126
1876.89	22.6446	22.5627	22.7266
1876.81	22.8985	22.8092	22.9877
1876.72	23.056	22.9572	23.1548
1876.64	23.1092	23.0064	23.2119
1876.56	23.0443	22.9462	23.1423
1876.47	23.0012	22.906	23.0963
1876.39	22.8275	22.7414	22.9136
1876.31	22.6704	22.5883	22.7525
1876.22	22.5521	22.4699	22.6343
1876.14	22.4882	22.4048	22.5715
1876.06	22.4781	22.3945	22.5617
1875.97	22.514	22.4312	22.5967
1875.89	22.5257	22.4431	22.6083
1875.81	22.5527	22.4705	22.6349
1875.72	22.4937	22.4105	22.5769
1875.64	22.4007	22.3146	22.4868
1875.56	22.2912	22.1999	22.3825
1875.47	22.229	22.134	22.3241
1875.39	22.0979	21.9936	22.2023
1875.31	22.0241	21.9137	22.1344
1875.22	21.9178	21.7981	22.0375
1875.14	21.8168	21.6875	21.946
1875.06	21.7439	21.6075	21.8804
1874.97	21.7287	21.5907	21.8667
1874.89	21.7338	21.5963	21.8712
1874.81	21.8399	21.7129	21.9669
1874.72	21.9684	21.8532	22.0835
1874.64	21.9917	21.8786	22.1049
1874.56	21.9864	21.8728	22.1
1874.47	21.9904	21.8772	22.1036
1874.39	21.9739	21.8592	22.0886
1874.31	21.9339	21.8157	22.0522
1874.22	21.9244	21.8053	22.0435
1874.14	21.9014	21.7802	22.0226
1874.06	21.9248	21.8058	22.0439
1873.97	21.9561	21.8398	22.0723
1873.89	21.9964	21.8837	22.1091
1873.81	22.0863	21.9811	22.1916
1873.72	22.207	22.1106	22.3035
1873.64	22.2601	22.167	22.3532
1873.56	22.2921	22.2009	22.3834
1873.47	22.2198	22.1242	22.3155
1873.39	22.0674	21.9607	22.1742
1873.31	21.9029	21.7819	22.024
1873.22	21.7374	21.6004	21.8745
1873.14	21.5553	21.3993	21.7114
1873.06	21.4755	21.3108	21.6401
1872.97	21.5089	21.3478	21.6699
1872.89	21.5493	21.3927	21.706
1872.81	21.641	21.494	21.7879
1872.72	21.716	21.5768	21.8553
1872.64	21.7581	21.6231	21.8932
1872.56	21.7119	21.5723	21.8516
1872.47	21.6592	21.5141	21.8043
1872.39	21.582	21.4289	21.7352
1872.31	21.5126	21.352	21.6732
1872.22	21.4577	21.2911	21.6242
1872.14	21.4194	21.2486	21.5902
1872.06	21.4069	21.2347	21.579
1871.97	21.4315	21.2621	21.601
1871.89	21.4843	21.3206	21.6479
1871.81	21.5524	21.396	21.7087
1871.72	21.6077	21.4572	21.7582
1871.64	21.6708	21.5269	21.8147
1871.56	21.7045	21.564	21.8449
1871.47	21.705	21.5646	21.8454
1871.39	21.6809	21.538	21.8237
1871.31	21.6617	21.5168	21.8065
1871.22	21.6008	21.4496	21.752
1871.14	21.5408	21.3833	21.6984
1871.06	21.5474	21.3906	21.7043
1870.97	21.6147	21.465	21.7644
1870.89	21.638	21.4907	21.7852
1870.81	21.7495	21.6137	21.8854
1870.72	21.8412	21.7143	21.9681
1870.64	21.8683	21.744	21.9926
1870.56	21.811	21.6812	21.9408
1870.47	21.7484	21.6124	21.8844
1870.39	21.715	21.5756	21.8544
1870.31	21.5922	21.4401	21.7443
1870.22	21.5367	21.3787	21.6947
1870.14	21.6952	21.5538	21.8365
1870.06	21.7726	21.639	21.9062
1869.97	21.7925	21.6609	21.9241
1869.89	21.9874	21.8739	22.1008
1869.81	22.2106	22.1144	22.3068
1869.72	22.2588	22.1656	22.352
1869.64	22.4262	22.341	22.5113
1869.56	22.5386	22.4562	22.621
1869.47	22.5521	22.4699	22.6343
1869.39	22.4301	22.345	22.5151
1869.31	22.2594	22.1662	22.3525
1869.22	22.0625	21.9553	22.1697
1869.14	21.8637	21.7389	21.9884
1869.06	21.7161	21.5769	21.8554
1868.97	21.6325	21.4846	21.7804
1868.89	21.6446	21.498	21.7912
1868.81	21.7733	21.6398	21.9068
1868.72	21.8919	21.7699	22.014
1868.64	21.9614	21.8456	22.0772
1868.56	22.0212	21.9106	22.1318
1868.47	22.0229	21.9125	22.1333
1868.39	21.9682	21.853	22.0834
1868.31	21.905	21.7842	22.0259
1868.22	21.8015	21.6708	21.9323
1868.14	21.6966	21.5554	21.8378
1868.06	21.6206	21.4715	21.7697
1867.97	21.5639	21.4088	21.719
1867.89	21.5446	21.3875	21.7018
1867.81	21.6814	21.5386	21.8242
1867.72	21.7714	21.6377	21.9051
1867.64	21.8405	21.7135	21.9674
1867.56	21.856	21.7306	21.9815
1867.47	21.8379	21.7107	21.9651
1867.39	21.7029	21.5623	21.8435
1867.31	21.5568	21.4009	21.7126
1867.22	21.3991	21.2261	21.5721
1867.14	21.2869	21.1014	21.4724
1867.06	21.2768	21.0902	21.4635
1866.97	21.3577	21.1801	21.5353
1866.89	21.4799	21.3158	21.6441
1866.81	21.6398	21.4927	21.7869
1866.72	21.7746	21.6412	21.908
1866.64	21.8419	21.7151	21.9687
1866.56	21.8405	21.7136	21.9675
1866.47	21.8153	21.686	21.9447
1866.39	21.7335	21.5961	21.871
1866.31	21.6281	21.4798	21.7764
1866.22	21.4942	21.3316	21.6568
1866.14	21.3567	21.179	21.5344
1866.06	21.2968	21.1124	21.4813
1865.97	21.2877	21.1023	21.4731
1865.89	21.3758	21.2002	21.5514
1865.81	21.58	21.4267	21.7334
1865.72	21.6518	21.506	21.7977
1865.64	21.56	21.4045	21.7155
1865.56	21.5199	21.3601	21.6797
1865.47	21.4302	21.2606	21.5998
1865.39	21.2457	21.0556	21.4359
1865.31	21.213	21.0191	21.4069
1865.22	21.2944	21.1097	21.4791
1865.14	21.299	21.1148	21.4832
1865.06	21.304	21.1204	21.4876
1864.97	21.3109	21.1281	21.4938
1864.89	21.2832	21.0973	21.4692
1864.81	21.2864	21.1009	21.472
1864.72	21.3667	21.1901	21.5433
1864.64	21.3564	21.1787	21.5342
1864.56	21.3579	21.1803	21.5354
1864.47	21.3826	21.2078	21.5575
1864.39	21.3729	21.1969	21.5488
1864.31	21.2731	21.086	21.4602
1864.22	21.2613	21.0729	21.4497
1864.14	21.2438	21.0534	21.4342
1864.06	21.3416	21.1623	21.521
1863.97	21.513	21.3525	21.6736
1863.89	21.7199	21.581	21.8587
1863.81	21.9241	21.805	22.0433
1863.72	22.1232	22.0208	22.2256
1863.64	22.1939	22.0966	22.2913
1863.56	22.163	22.0635	22.2625
1863.47	22.0917	21.9869	22.1966
1863.39	21.9951	21.8823	22.1079
1863.31	21.8244	21.6959	21.9529
1863.22	21.6552	21.5097	21.8007
1863.14	21.4753	21.3107	21.64
1863.06	21.5179	21.3579	21.6779
1862.97	21.4387	21.27	21.6073
1862.89	21.584	21.431	21.7369
1862.81	21.8333	21.7056	21.9609
1862.72	22.0831	21.9776	22.1886
1862.64	22.0796	21.9738	22.1854
1862.56	22.1575	22.0576	22.2574
1862.47	22.0453	21.9367	22.1539
1862.39	21.7986	21.6676	21.9296
1862.31	21.5566	21.4007	21.7125
1862.22	21.3406	21.1611	21.5201
1862.14	21.1902	20.9937	21.3867
1862.06	21.1551	20.9546	21.3556
1861.97	21.2277	21.0354	21.4199
1861.89	21.4425	21.2743	21.6107
1861.81	21.8093	21.6793	21.9393
1861.72	22.1543	22.0542	22.2545
1861.64	22.4141	22.3285	22.4997
1861.56	22.5147	22.432	22.5975
1861.47	22.4879	22.4045	22.5712
1861.39	22.3104	22.2202	22.4007
1861.31	22.0639	21.9569	22.171
1861.22	21.8311	21.7033	21.959
1861.14	21.6466	21.5002	21.793
1861.06	21.6177	21.4683	21.7671
1860.97	21.7076	21.5675	21.8477
1860.89	21.9321	21.8137	22.0505
1860.81	22.176	22.0774	22.2746
1860.72	22.4381	22.3533	22.5228
1860.64	22.5812	22.4992	22.6631
1860.56	22.6628	22.5807	22.7448
1860.47	22.6135	22.5316	22.6953
1860.39	22.4932	22.4099	22.5764
1860.31	22.3438	22.2552	22.4324
1860.22	22.0026	21.8905	22.1148
1860.14	21.6006	21.4494	21.7518
1860.06	21.5437	21.3864	21.7009
1859.97	21.56	21.4044	21.7155
1859.89	21.7347	21.5973	21.872
1859.81	22.1297	22.0278	22.2316
1859.72	22.5148	22.4321	22.5976
1859.64	22.5604	22.4783	22.6425
1859.56	22.4987	22.4156	22.5818
1859.47	22.242	22.1478	22.3362
1859.39	21.8548	21.7292	21.9804
1859.31	21.4454	21.2775	21.6133
1859.22	21.0634	20.8523	21.2744
1859.14	20.7779	20.5334	21.0223
1859.06	20.7858	20.5423	21.0294
1858.97	21.0182	20.8019	21.2345
1858.89	21.3994	21.2265	21.5724
1858.81	21.8354	21.708	21.9628
1858.72	22.252	22.1584	22.3456
1858.64	22.4455	22.3609	22.53
1858.56	22.5259	22.4433	22.6085
1858.47	22.5019	22.4188	22.5849
1858.39	22.4724	22.3886	22.5561
1858.31	22.4213	22.336	22.5067
1858.22	22.2267	22.1315	22.3219
1858.14	21.8931	21.7711	22.0151
1858.06	21.7397	21.6029	21.8766
1857.97	21.7004	21.5595	21.8412
1857.89	21.7532	21.6176	21.8887
1857.81	22.0128	21.9015	22.1241
1857.72	22.3848	22.298	22.4715
1857.64	22.6082	22.5263	22.69
1857.56	22.6863	22.604	22.7686
1857.47	22.7302	22.6471	22.8133
1857.39	22.7253	22.6423	22.8083
1857.31	22.6946	22.6121	22.777
1857.22	22.6476	22.5656	22.7295
1857.14	22.5404	22.4581	22.6228
1857.06	22.4719	22.3881	22.5556
1856.97	22.4761	22.3924	22.5597
1856.89	22.5789	22.497	22.6609
1856.81	22.7286	22.6455	22.8117
1856.72	22.8975	22.8083	22.9867
1856.64	23.0307	22.9336	23.1278
1856.56	23.0631	22.9638	23.1625
1856.47	22.9873	22.893	23.0816
1856.39	22.7962	22.7113	22.8812
1856.31	22.5946	22.5127	22.6765
1856.22	22.318	22.2281	22.4079
1856.14	22.1273	22.0252	22.2294
1856.06	22.0549	21.9471	22.1627
1855.97	22.0696	21.963	22.1762
1855.89	22.1609	22.0612	22.2605
1855.81	22.4046	22.3186	22.4905
1855.72	22.5512	22.469	22.6335
1855.64	22.4569	22.3728	22.5411
1855.56	22.3867	22.3	22.4733
1855.47	22.2855	22.1938	22.3771
1855.39	22.0051	21.8931	22.117
1855.31	21.8463	21.7199	21.9727
1855.22	21.8003	21.6694	21.9311
1855.14	21.6496	21.5036	21.7957
1855.06	21.549	21.3923	21.7057
1854.97	21.5716	21.4173	21.7259
1854.89	21.5319	21.3733	21.6904
1854.81	21.611	21.4608	21.7611
1854.72	21.7218	21.5831	21.8604
1854.64	21.7561	21.6209	21.8913
1854.56	21.7798	21.6469	21.9127
1854.47	21.7918	21.6602	21.9235
1854.39	21.6758	21.5325	21.8192
1854.31	21.7002	21.5594	21.8411
1854.22	21.7095	21.5696	21.8495
1854.14	21.7581	21.623	21.8931
1854.06	21.7236	21.5852	21.8621
1853.97	21.7779	21.6449	21.911
1853.89	21.7222	21.5836	21.8609
1853.81	21.6925	21.5509	21.8342
1853.72	21.6099	21.4597	21.7602
1853.64	21.6314	21.4834	21.7794
1853.56	21.5834	21.4304	21.7364
1853.47	21.5302	21.3715	21.6889
1853.39	21.5704	21.416	21.7248
1853.31	21.5977	21.4462	21.7492
1853.22	21.5418	21.3843	21.6992
1853.14	21.4744	21.3096	21.6391
1853.06	21.4547	21.2878	21.6216
1852.97	21.4355	21.2665	21.6045
1852.89	21.4274	21.2575	21.5973
1852.81	21.5566	21.4007	21.7125
1852.72	21.7539	21.6185	21.8894
1852.64	21.9237	21.8045	22.0428
1852.56	21.9557	21.8394	22.072
1852.47	21.9393	21.8216	22.0571
1852.39	21.839	21.7119	21.9661
1852.31	21.6364	21.4889	21.7838
1852.22	21.4653	21.2996	21.6311
1852.14	21.361	21.1838	21.5383
1852.06	21.2933	21.1085	21.4781
1851.97	21.2426	21.0521	21.4331
1851.89	20.3151	20.0153	20.6149
1851.81	20.3088	20.0082	20.6093
1851.72	20.3554	20.0604	20.6503
1851.64	20.3706	20.0775	20.6637
1851.56	20.4054	20.1164	20.6943
1851.47	21.3471	21.1683	21.5259
1851.39	21.3378	21.158	21.5176
1851.31	21.2855	21.0998	21.4712
1851.22	21.1743	20.976	21.3726
1851.14	20.9239	20.6967	21.1512
1851.06	20.8176	20.5778	21.0573
1850.97	20.7803	20.5361	21.0245
1850.89	20.8252	20.5863	21.0641
1850.81	21.024	20.8084	21.2396
1850.72	21.3083	21.1251	21.4914
1850.64	21.3891	21.215	21.5632
1850.56	21.43	21.2604	21.5996
1850.47	21.3649	21.1881	21.5417
1850.39	21.2849	21.0992	21.4707
1850.31	21.2165	21.023	21.41
1850.22	21.2338	21.0422	21.4253
1850.14	21.1014	20.8948	21.3081
1850.06	21.1696	20.9707	21.3684
1849.97	21.2395	21.0487	21.4304
1849.89	21.2918	21.1069	21.4768
1849.81	21.4113	21.2396	21.5829
1849.72	21.5795	21.426	21.7329
1849.64	21.5835	21.4305	21.7365
1849.56	21.5687	21.4142	21.7233
1849.47	21.5081	21.3471	21.6692
1849.39	21.4487	21.2811	21.6162
1849.31	21.3734	21.1976	21.5493
1849.22	21.3374	21.1575	21.5172
1849.14	21.358	21.1804	21.5356
1849.06	21.3104	21.1275	21.4933
1848.97	21.2366	21.0454	21.4278
1848.89	21.2845	21.0987	21.4703
1848.81	21.3628	21.1857	21.5398
1848.72	21.286	21.1003	21.4716
1848.64	21.4157	21.2446	21.5869
1848.56	21.5573	21.4015	21.7131
1848.47	21.56	21.4045	21.7155
1848.39	21.6089	21.4586	21.7592
1848.31	21.5252	21.366	21.6844
1848.22	21.4752	21.3105	21.6399
1848.14	21.3607	21.1834	21.5379
1848.06	21.3338	21.1535	21.5141
1847.97	21.1556	20.9551	21.356
1847.89	21.2271	21.0348	21.4194
1847.81	21.2699	21.0824	21.4573
1847.72	21.2721	21.0849	21.4593
1847.64	21.2574	21.0685	21.4462
1847.56	21.1864	20.9894	21.3833
1847.47	21.1533	20.9526	21.354
1847.39	21.0362	20.822	21.2504
1847.31	20.9616	20.7387	21.1845
1847.22	20.8183	20.5786	21.058
1847.14	20.8035	20.562	21.0449
1847.06	20.7839	20.5401	21.0276
1846.97	20.8243	20.5853	21.0633
1846.89	20.9484	20.724	21.1728
1846.81	21.262	21.0737	21.4504
1846.72	21.5072	21.346	21.6684
[truncated: 4,688 more rows]
